# Supplementary material for: Unique mutation portraits and frequent COL2A1 gene alteration in chondrosarcoma
Source: HighWire-hosted journal article supplement (doi:10.1101/gr.160598.113), 2014-07-14
Supplement: Supp_Figure_Legends.pdf [file Supp_Figure_Legends.pdf]

## **Supplementary Figure legends**

### **Supplementary Figure S1**

**Principal component analysis of six substitutions in chondrosarcoma.** No significant association was observed between substitution patterns and tumor subtype ( $P=0.89$ ) and the presence of *IDH1* mutation ( $P=0.13$ ).

### **Supplementary Figure S2**

**Ratio of each somatic substitution and its association with histological subtype or *IDH1* mutation status.** (A) Somatic cytosine substitutions were classified into those at CpG and non-CpG sites. Ratio of each substitution to total number of substitutions in each case was shown. (B) No significant association was observed between substitution patterns and tumor subtype ( $P=0.90$ ) and the presence of *IDH1* mutation ( $P=0.11$ ).

### **Supplementary Figure S3**

**Disproportional number of somatic substitutions on transcribed and untranscribed strands in chondrosarcoma.** Number of each substitution on transcribed (blue) and untranscribed (red) strands were plotted. Significant difference in number between the two strands was indicated by asterisks. \*,  $P<0.05$ , \*\*,  $P<0.02$ , \*\*\*,  $P<0.001$ , \*\*\*\*,  $P<0.0001$ .

### **Supplementary Figure S4**

**Frequencies of mutation portraits (combination of immediate 5' and 3' bases with**

**six substitutions) in chondrosarcoma cases.** Frequency of each mutation portrait (combination of immediate 5' and 3' bases with six substitutions) is indicated by different color columns.

#### **Supplementary Figure S5**

**Frequencies of 96 mutation portraits (combination of immediate 5' and 3' bases with six substitutions) in chondrosarcoma and other cancer types.** Frequencies of each mutation portrait (combination of immediate 5' and 3' bases with six substitutions) are indicated by different color columns.

#### **Supplementary Figure S6**

**Principal component analysis of 96 mutation portraits (combination of immediate 5' and 3' bases with six substitutions) in chondrosarcoma and other cancer types.**

Red, green, orange and purple dots indicate each case of chondrosarcoma, prostate cancer, chronic lymphocytic leukemia and liver cancer. Blue dots indicate melanoma and smoking-associated lung cancers. Note that remarkable overlap of chondrosarcoma and prostate cancer cases.

#### **Supplementary Figure S7**

**Characteristic base contexts at C>A and C>T mutations in chondrosarcoma**

Sequence logos of consensus surrounding sequences enriched at C>A (A) and C>T (B) mutations in chondrosarcoma and other tumor types. X-axis indicates base position

from the mutation site (center: mutation position, left: 5' position of the mutation, right: 3' position of the mutation). Y-axis indicates the information content at each position in the sequence.

### **Supplementary Figure S8**

#### **Circos plot of chondrosarcoma cases**

Structural alterations (Red line: deletion, Green line; inversion, Blue line: tandem duplication, Purple line; translocation) are shown in the inner circle. Copy number changes (Green; copy gain/amplification, Red: copy loss) are shown in the outer circle. Arrowed lines indicate regions of localized accumulation of structural alterations.

### **Supplementary Figure S9**

#### **Complex rearrangements in chondrosarcoma**

Copy numbers were calculated by comparing read depth in tumor and normal samples in the 5 kb window.

### **Supplementary Figure S10**

#### **Association between *IDH1*/*COL2A1* mutation status and patients' prognosis**

Kaplan-Meier plot of overall survival (A) and metastasis-free survival (B) segregated by *IDH1* (left) and *COL2A1* (right) mutation status. Green and blue line indicate mutation-positive and mutation negative cases respectively.

### **Supplementary Figure S11**

#### **Validation of *FNI-ACVR2A* gene fusion by whole transcriptome sequencing (WTS).**

Eighty-one WTS reads which overlapped the fusion point of *FNI* and *ACVR2A* genes are shown.

### **Supplementary Figure S12**

#### **Estimation of *FNI* gene expression at nucleotide resolution by counting RNA sequencing reads. An arrow indicates the fusion point.**

### **Supplementary Figure S13**

**Nucleotide variations in *FNI-ACVR2A* fusion transcripts between chondrosarcoma (CS6T) and osteochondromatosis (1804T) cases.** Alignment of *FNI-ACVR2A* fusion cDNA obtained from CS6T (top) and 1804T (bottom). There are two distinctive SNPs between the two transcripts, which clearly demonstrates that the two transcripts are derived from different samples.

### **Supplementary Figure S14**

#### **Schematic presentation of step-wise genetic alterations in chondrosarcomagenesis.**

Molecules involved in chondrocyte differentiation and epigenetic regulation together with *TP53* are causative of benign and malignant cartilaginous tumors. MSC: mesenchymal stem cell.

**Supplementary Table S1**

**Germline mutations of *EXT1* and *EXT2* genes in peripheral chondrosarcoma cases**

**Supplementary Table S2**

**Summary of clinical data and somatic alterations of 10 chondrosarcoma cases analyzed by whole-genome sequencing.**

**Supplementary Table S3**

**Somatic mutations and indels detected in this analysis**

**Supplementary Table S4**

**Gene set enrichment analysis of genes with non-synonymous mutations in chondrosarcoma**

**Supplementary Table S5**

**Genes affected by amplifications detected in this analysis**

**Supplementary Table S6**

**Structural alterations predicted in this analysis**

Direction indicates the relative orientation of the paired reads on either side of the breakpoint. Class indicates the category of the structural alteration predicted by direction.

**Supplementary Table S7**

**Significantly mutated gene in discovery set**

**Supplementary Table S8**

**Clinical data of validation set cohort**

**Supplementary Table S9**

**Mutations detected in a validation cohort**

Red backgrounds indicate mutations documented somatically acquired.

**Supplementary Table S10**

**Expression level of *COL2A1*, *ACVR2A* and *YEATS2* genes calculated by RNA sequences (RPKM: number of reads per kb per million sequences)**

**Supplementary Table S11**

**Primers used in validation study**
