# Supplementary material for: Unique mutation portraits and frequent COL2A1 gene alteration in chondrosarcoma
Source: HighWire-hosted journal article supplement (doi:10.1101/gr.160598.113), 2014-07-14
Supplement: Supp_Figure_S11.pdf [file Supp_Figure_S11.pdf]

## ACVR2A exon #2

[illegible][illegible]
