# Supplementary material for: Unique mutation portraits and frequent COL2A1 gene alteration in chondrosarcoma
Source: HighWire-hosted journal article supplement (doi:10.1101/gr.160598.113), 2014-07-14
Supplement: Supp_Table_S1.xlsx [file Supp_Table_S1.xlsx]

## Sheet: MEMO.CS
Sample	Chr.	Position	Type	#Read	dbSNP	Mutation	Allele_frequency	Gene	Strand	Accession#	CDS_exon#	#CDS_exon	CDS position	Codon position	Reference	Allele1	Allele2
CS03N	8	118830770	splice_site	20	novel	C>G	0.45	EXT1	-	NM_000127	7	11
CS01N	11	44129329	nonsense	17	novel	C>T	0.412	EXT2	+	NM_000401	2	14	166	1	R	R	Stop
CS04N	11	44253992	insertion	26	novel	->T	0.269	EXT2	+	NM_000401	11	14	1851
CS10N	11	44129329	nonsense	8	novel	C>T	0.5	EXT2	+	NM_000401	2	14	166	1	R	R	Stop
