# Supplementary material for: Unique mutation portraits and frequent COL2A1 gene alteration in chondrosarcoma
Source: HighWire-hosted journal article supplement (doi:10.1101/gr.160598.113), 2014-07-14
Supplement: Supp_Table_S2.xlsx [file Supp_Table_S2.xlsx]

## Sheet: Sheet1
	CS01	CS02	CS03	CS04	CS05	CS06	CS07	CS08	CS09	CS10
Age	14	32	58	43	62	86	50	58	54	33
Gender	F	M	M	M	F	F	F	F	F	M
Site	Rib	Pelvis	Pelvis	Pelvis	Humerus	Knee	Rib	Pelvis	Scapula	Tibia
Subtype	Peripheral	Central	Peripheral	Peripheral	Central	Synovial	Central	Central	Central	Peripheral
Tumor Grade	1	2	1	1	3	2	2	2	3	1
Clinical Background	Multiple osteochondromatosis		Multiple osteochondromatosis	Multiple osteochondromatosis						Multiple osteochondromatosis
Average squence depth (Tumor)	42.6	34.2	27.6	30.8	33.4	37.7	37.2	37.2	29	24.7
Average sequence depth (Normal)	32.7	31.6	25.4	32.9	32.8	32.7	27.6	31.6	35	31.6
Number of somatic substitutions	3521	5005	6128	2215	5043	3705	4100	5326	2288	7014
Number of nonsynonymous substitution	10	26	37	7	26	11	29	26	12	27
Number of splice site mutation	0	3	0	0	0	0	2	0	0	1
Number of somatic indels (Non-repeat region)	544	299	517	314	356	444	528	331	269	494
Number of somatic indels (Coding region)	0	1	2	0	1	1	4	2	1	2
Number of somatic indels (Splice site)	0	0	0	0	0	0	0	0	0	0
Rearrangement break points	66	60	45	44	24	23	1	40	10	37
deletion	11	8	6	0	10	3	0	8	0	15
inversion	28	32	14	18	6	9	1	12	8	6
tandem duplication	22	17	12	14	4	4	0	9	0	9
translocation	5	3	13	12	4	7	0	11	2	7
