# Supplementary material for: Unique mutation portraits and frequent COL2A1 gene alteration in chondrosarcoma
Source: HighWire-hosted journal article supplement (doi:10.1101/gr.160598.113), 2014-07-14
Supplement: Supp_Table_S4.xlsx [file Supp_Table_S4.xlsx]

## Sheet: Table S4_CS.txt
Gene Set Name	# Genes in Gene Set (K)	Description	# Genes in Overlap (k)	k/K	p value
MEMBRANE	1942	Genes annotated by the GO term GO:0016020. Double layer of lipid molecules that encloses all cells, and, in eukaryotes, many organelles; may be a single or double lipid bilayer; also includes associated proteins.	24	0.0124	3.98e-07
TRANSMEMBRANE_RECEPTOR_ACTIVITY	411	Genes annotated by the GO term GO:0004888. Combining with an extracellular or intracellular messenger to initiate a change in cell activity, and spanning to the membrane of either the cell or an organelle.	11	0.0268	6.53e-07
INTEGRAL_TO_MEMBRANE	1301	Genes annotated by the GO term GO:0016021. Penetrating at least one phospholipid bilayer of a membrane. May also refer to the state of being buried in the bilayer with no exposure outside the bilayer. When used to describe a protein, indicates that all or part of the peptide sequence is embedded in the membrane.	19	0.0146	6.74e-07
INTRINSIC_TO_MEMBRANE	1319	Genes annotated by the GO term GO:0031224. Located in a membrane such that some covalently attached portion of the gene product, for example part of a peptide sequence or some other covalently attached moiety such as a GPI anchor, spans or is embedded in one or both leaflets of the membrane.	19	0.0144	8.28e-07
module_11	526	Genes in module_11	12	0.0228	1.06e-06
module_100	529	Genes in module_100	12	0.0227	1.13e-06
module_137	531	Genes in module_137	12	0.0226	1.17e-06
MEMBRANE_PART	1633	Genes annotated by the GO term GO:0044425. Any constituent part of a membrane, a double layer of lipid molecules that encloses all cells, and, in eukaryotes, many organelles; may be a single or double lipid bilayer; also includes associated proteins.	21	0.0129	1.27e-06
module_66	536	Genes in module_66	12	0.0224	1.29e-06
CAGGTG_V$E12_Q6	1850	Genes with promoter regions [-2kb,2kb] around transcription start site containing the motif CAGGTG which matches annotation for TCF3: transcription factor 3 (E2A immunoglobulin enhancer binding factors E12/E47)	22	0.0119	2.48e-06
ACEVEDO_METHYLATED_IN_LIVER_CANCER_UP	2393	Genes whose DNA is hypo-methylated in hepatocellular carcinoma (HCC) compared to normal liver.	24	0.01	1.48e-05
RECEPTOR_ACTIVITY	572	Genes annotated by the GO term GO:0004872. Combining with an extracellular or intracellular messenger to initiate a change in cell activity.	11	0.0192	1.52e-05
ACEVEDO_METHYLATED_IN_LIVER_CANCER_DN	927	Genes whose DNA is hyper-methylated in hepatocellular carcinoma (HCC) compared to normal liver.	14	0.0151	1.56e-05
REACTOME_P75_NTR_RECEPTOR_MEDIATED_SIGNALLING	82	Genes involved in p75 NTR receptor-mediated signalling	5	0.061	1.76e-05
MORF_ARL3	293	Neighborhood of ARL3	8	0.0273	2.02e-05
KEGG_TYROSINE_METABOLISM	42	Tyrosine metabolism	4	0.0952	2.18e-05
INTEGRAL_TO_PLASMA_MEMBRANE	963	Genes annotated by the GO term GO:0005887. Penetrating at least one phospholipid bilayer of a plasma membrane. May also refer to the state of being buried in the bilayer with no exposure outside the bilayer.	14	0.0145	2.37e-05
INTRINSIC_TO_PLASMA_MEMBRANE	977	Genes annotated by the GO term GO:0031226. Located in the plasma membrane such that some covalently attached portion of the gene product, for example part of a peptide sequence or some other covalently attached moiety such as a GPI anchor, spans or is embedded in one or both leaflets of the membrane.	14	0.0143	2.78e-05
MORF_MAGEA9	409	Neighborhood of MAGEA9	9	0.022	3.33e-05
REACTOME_NRAGE_SIGNALS_DEATH_THROUGH_JNK	47	Genes involved in NRAGE signals death through JNK	4	0.0851	3.42e-05
REACTOME_G_ALPHA_12_13_SIGNALLING_EVENTS	54	Genes involved in G alpha (12/13) signalling events	4	0.0741	5.93e-05
SYSTEM_PROCESS	558	Genes annotated by the GO term GO:0003008. A biological process, occurring at the level of an organ system pertinent to the function of the organism. An organ system is a regularly interacting or interdependent group of organs or tissues that work together to carry out a given biological process.	10	0.0179	6.8e-05
MORF_BCL2L11	180	Neighborhood of BCL2L11	6	0.0333	7.66e-05
OXIDOREDUCTASE_ACTIVITY_GO_0016616	58	Genes annotated by the GO term GO:0016616. Catalysis of an oxidation-reduction (redox) reaction in which a CH-OH group acts as a hydrogen or electron donor and reduces NAD+ or NADP.	4	0.069	7.86e-05
MYLLYKANGAS_AMPLIFICATION_HOT_SPOT_23	22	Amplification hot spot 23: colocolized fragile sites and cancer genes in the 11q12-q25 region.	3	0.1364	8.38e-05
GTGCCAA,MIR-96	267	Targets of MicroRNA GTGCCAA,MIR-96	7	0.0262	8.72e-05
REACTOME_CELL_DEATH_SIGNALLING_VIA_NRAGE_NRIF_AND_NADE	61	Genes involved in Cell death signalling via NRAGE, NRIF and NADE	4	0.0656	9.59e-05
REACTOME_SIGNALING_BY_BMP	23	Genes involved in Signaling by BMP	3	0.1304	9.61e-05
PLASMA_MEMBRANE	1393	Genes annotated by the GO term GO:0005886. The membrane surrounding a cell that separates the cell from its external environment. It consists of a phospholipid bilayer and associated proteins.	16	0.0115	0.000102
OXIDOREDUCTASE_ACTIVITY_ACTING_ON_CH_OH_GROUP_OF_DONORS	64	Genes annotated by the GO term GO:0016614. Catalysis of an oxidation-reduction (redox) reaction in which a CH-OH group act as a hydrogen or electron donor and reduces a hydrogen or electron acceptor.	4	0.0625	0.000116
MORF_CD8A	124	Neighborhood of CD8A	5	0.0403	0.000128
REACTOME_RHO_GTPASE_CYCLE	124	Genes involved in Rho GTPase cycle	5	0.0403	0.000128
CTAWWWATA_V$RSRFC4_Q2	284	Genes with promoter regions [-2kb,2kb] around transcription start site containing the motif CTAWWWATA which matches annotation for MEF2A: MADS box transcription enhancer factor 2, polypeptide A (myocyte enhancer factor 2A)	7	0.0246	0.000128
CYTOPLASM	2066	Genes annotated by the GO term GO:0005737. All of the contents of a cell excluding the plasma membrane and nucleus, but including other subcellular structures.	20	0.0097	0.000138
DING_LUNG_CANCER_MUTATED_SIGNIFICANTLY	26	The lung adenocarcinoma TSP (tumor sequencing project) genes that were found significantly mutated by at least one method.	3	0.1154	0.00014
PLASMA_MEMBRANE_PART	1141	Genes annotated by the GO term GO:0044459. Any constituent part of the plasma membrane, the membrane surrounding a cell that separates the cell from its external environment. It consists of a phospholipid bilayer and associated proteins.	14	0.0123	0.000145
MORF_FOSL1	390	Neighborhood of FOSL1	8	0.0205	0.000149
MORF_MYL3	69	Neighborhood of MYL3	4	0.058	0.000155
module_13	501	Genes in module_13	9	0.018	0.000156
SENESE_HDAC3_TARGETS_UP	501	Genes up-regulated in U2OS cells (osteosarcoma) upon knockdown of HDAC3 [Gene ID=8841] by RNAi.	9	0.018	0.000156
TATAAA_V$TATA_01	1033	Genes with promoter regions [-2kb,2kb] around transcription start site containing the motif TATAAA which matches annotation for TAF<br> TATA	13	0.0126	0.000199
MORF_ERCC4	312	Neighborhood of ERCC4	7	0.0224	0.000227
BIOCARTA_NO1_PATHWAY	31	Actions of Nitric Oxide in the Heart	3	0.0968	0.000239
ATACCTC,MIR-202	151	Targets of MicroRNA ATACCTC,MIR-202	5	0.0331	0.000319
CATGTAA,MIR-496	152	Targets of MicroRNA CATGTAA,MIR-496	5	0.0329	0.000329
module_104	341	Genes in module_104	7	0.0205	0.000389
MORF_PTPRB	245	Neighborhood of PTPRB	6	0.0245	0.000406
MORF_PPP2R5B	162	Neighborhood of PPP2R5B	5	0.0309	0.000441
TGGAAA_V$NFAT_Q4_01	1438	Genes with promoter regions [-2kb,2kb] around transcription start site containing the motif TGGAAA which matches annotation for NFAT<br> NFATC	15	0.0104	0.000475
module_567	93	Genes in module_567	4	0.043	0.000487
Gene/Gene Set Overlap Matrix
Gene Symbol	Description	MEMBRANE	TRANSMEMBRANE_RECEPTOR_ACTIVITY	INTEGRAL_TO_MEMBRANE	INTRINSIC_TO_MEMBRANE	module_11	module_100	module_137	MEMBRANE_PART	module_66	CAGGTG_V$E12_Q6	ACEVEDO_METHYLATED_IN_LIVER_CANCER_UP	RECEPTOR_ACTIVITY	ACEVEDO_METHYLATED_IN_LIVER_CANCER_DN	REACTOME_P75_NTR_RECEPTOR_MEDIATED_SIGNALLING	MORF_ARL3	KEGG_TYROSINE_METABOLISM	INTEGRAL_TO_PLASMA_MEMBRANE	INTRINSIC_TO_PLASMA_MEMBRANE	MORF_MAGEA9	REACTOME_NRAGE_SIGNALS_DEATH_THROUGH_JNK	REACTOME_G_ALPHA_12_13_SIGNALLING_EVENTS	SYSTEM_PROCESS	MORF_BCL2L11	OXIDOREDUCTASE_ACTIVITY_GO_0016616	MYLLYKANGAS_AMPLIFICATION_HOT_SPOT_23	GTGCCAA,MIR-96	REACTOME_CELL_DEATH_SIGNALLING_VIA_NRAGE_NRIF_AND_NADE	REACTOME_SIGNALING_BY_BMP	PLASMA_MEMBRANE	OXIDOREDUCTASE_ACTIVITY_ACTING_ON_CH_OH_GROUP_OF_DONORS	MORF_CD8A	REACTOME_RHO_GTPASE_CYCLE	CTAWWWATA_V$RSRFC4_Q2	CYTOPLASM	DING_LUNG_CANCER_MUTATED_SIGNIFICANTLY	PLASMA_MEMBRANE_PART	MORF_FOSL1	MORF_MYL3	module_13	SENESE_HDAC3_TARGETS_UP	TATAAA_V$TATA_01	MORF_ERCC4	BIOCARTA_NO1_PATHWAY	ATACCTC,MIR-202	CATGTAA,MIR-496	module_104	MORF_PTPRB	MORF_PPP2R5B
MTNR1A	melatonin receptor 1A	MEMBRANE	TRANSMEMBRANE_RECEPTOR_ACTIVITY	INTEGRAL_TO_MEMBRANE	INTRINSIC_TO_MEMBRANE				MEMBRANE_PART		CAGGTG_V$E12_Q6		RECEPTOR_ACTIVITY	ACEVEDO_METHYLATED_IN_LIVER_CANCER_DN				INTEGRAL_TO_PLASMA_MEMBRANE	INTRINSIC_TO_PLASMA_MEMBRANE											PLASMA_MEMBRANE							PLASMA_MEMBRANE_PART
PTPRB	protein tyrosine phosphatase, receptor type, B	MEMBRANE	TRANSMEMBRANE_RECEPTOR_ACTIVITY	INTEGRAL_TO_MEMBRANE	INTRINSIC_TO_MEMBRANE				MEMBRANE_PART		CAGGTG_V$E12_Q6		RECEPTOR_ACTIVITY			MORF_ARL3		INTEGRAL_TO_PLASMA_MEMBRANE	INTRINSIC_TO_PLASMA_MEMBRANE	MORF_MAGEA9				MORF_BCL2L11						PLASMA_MEMBRANE		MORF_CD8A					PLASMA_MEMBRANE_PART	MORF_FOSL1	MORF_MYL3		SENESE_HDAC3_TARGETS_UP		MORF_ERCC4					MORF_PTPRB	MORF_PPP2R5B
CCKBR	cholecystokinin B receptor	MEMBRANE	TRANSMEMBRANE_RECEPTOR_ACTIVITY	INTEGRAL_TO_MEMBRANE	INTRINSIC_TO_MEMBRANE				MEMBRANE_PART		CAGGTG_V$E12_Q6		RECEPTOR_ACTIVITY					INTEGRAL_TO_PLASMA_MEMBRANE	INTRINSIC_TO_PLASMA_MEMBRANE				SYSTEM_PROCESS							PLASMA_MEMBRANE							PLASMA_MEMBRANE_PART
LPHN3	latrophilin 3	MEMBRANE	TRANSMEMBRANE_RECEPTOR_ACTIVITY	INTEGRAL_TO_MEMBRANE	INTRINSIC_TO_MEMBRANE				MEMBRANE_PART			ACEVEDO_METHYLATED_IN_LIVER_CANCER_UP	RECEPTOR_ACTIVITY																												SENESE_HDAC3_TARGETS_UP						module_104
KDR	kinase insert domain receptor (a type III receptor tyrosine kinase)	MEMBRANE	TRANSMEMBRANE_RECEPTOR_ACTIVITY	INTEGRAL_TO_MEMBRANE	INTRINSIC_TO_MEMBRANE				MEMBRANE_PART				RECEPTOR_ACTIVITY			MORF_ARL3		INTEGRAL_TO_PLASMA_MEMBRANE	INTRINSIC_TO_PLASMA_MEMBRANE	MORF_MAGEA9										PLASMA_MEMBRANE		MORF_CD8A				DING_LUNG_CANCER_MUTATED_SIGNIFICANTLY	PLASMA_MEMBRANE_PART		MORF_MYL3				MORF_ERCC4	BIOCARTA_NO1_PATHWAY				MORF_PTPRB
ACVR2A	activin A receptor, type IIA	MEMBRANE	TRANSMEMBRANE_RECEPTOR_ACTIVITY	INTEGRAL_TO_MEMBRANE	INTRINSIC_TO_MEMBRANE				MEMBRANE_PART				RECEPTOR_ACTIVITY					INTEGRAL_TO_PLASMA_MEMBRANE	INTRINSIC_TO_PLASMA_MEMBRANE								GTGCCAA,MIR-96		REACTOME_SIGNALING_BY_BMP	PLASMA_MEMBRANE					CYTOPLASM		PLASMA_MEMBRANE_PART								ATACCTC,MIR-202
ALK	anaplastic lymphoma kinase (Ki-1)	MEMBRANE	TRANSMEMBRANE_RECEPTOR_ACTIVITY	INTEGRAL_TO_MEMBRANE	INTRINSIC_TO_MEMBRANE				MEMBRANE_PART				RECEPTOR_ACTIVITY					INTEGRAL_TO_PLASMA_MEMBRANE	INTRINSIC_TO_PLASMA_MEMBRANE								GTGCCAA,MIR-96			PLASMA_MEMBRANE							PLASMA_MEMBRANE_PART
IL4R	interleukin 4 receptor	MEMBRANE	TRANSMEMBRANE_RECEPTOR_ACTIVITY	INTEGRAL_TO_MEMBRANE	INTRINSIC_TO_MEMBRANE				MEMBRANE_PART				RECEPTOR_ACTIVITY					INTEGRAL_TO_PLASMA_MEMBRANE	INTRINSIC_TO_PLASMA_MEMBRANE											PLASMA_MEMBRANE							PLASMA_MEMBRANE_PART
XPR1	xenotropic and polytropic retrovirus receptor	MEMBRANE	TRANSMEMBRANE_RECEPTOR_ACTIVITY	INTEGRAL_TO_MEMBRANE	INTRINSIC_TO_MEMBRANE				MEMBRANE_PART				RECEPTOR_ACTIVITY					INTEGRAL_TO_PLASMA_MEMBRANE	INTRINSIC_TO_PLASMA_MEMBRANE											PLASMA_MEMBRANE							PLASMA_MEMBRANE_PART
SCARF1	scavenger receptor class F, member 1	MEMBRANE	TRANSMEMBRANE_RECEPTOR_ACTIVITY	INTEGRAL_TO_MEMBRANE	INTRINSIC_TO_MEMBRANE				MEMBRANE_PART				RECEPTOR_ACTIVITY																													TATAAA_V$TATA_01
GPR111	G protein-coupled receptor 111	MEMBRANE	TRANSMEMBRANE_RECEPTOR_ACTIVITY	INTEGRAL_TO_MEMBRANE	INTRINSIC_TO_MEMBRANE				MEMBRANE_PART				RECEPTOR_ACTIVITY
AQP1	aquaporin 1 (Colton blood group)	MEMBRANE		INTEGRAL_TO_MEMBRANE	INTRINSIC_TO_MEMBRANE	module_11	module_100	module_137	MEMBRANE_PART	module_66	CAGGTG_V$E12_Q6							INTEGRAL_TO_PLASMA_MEMBRANE	INTRINSIC_TO_PLASMA_MEMBRANE				SYSTEM_PROCESS							PLASMA_MEMBRANE				CTAWWWATA_V$RSRFC4_Q2			PLASMA_MEMBRANE_PART					TATAAA_V$TATA_01
ROM1	retinal outer segment membrane protein 1	MEMBRANE		INTEGRAL_TO_MEMBRANE	INTRINSIC_TO_MEMBRANE				MEMBRANE_PART		CAGGTG_V$E12_Q6							INTEGRAL_TO_PLASMA_MEMBRANE	INTRINSIC_TO_PLASMA_MEMBRANE				SYSTEM_PROCESS							PLASMA_MEMBRANE							PLASMA_MEMBRANE_PART
ABCA7	ATP-binding cassette, sub-family A (ABC1), member 7	MEMBRANE		INTEGRAL_TO_MEMBRANE	INTRINSIC_TO_MEMBRANE				MEMBRANE_PART			ACEVEDO_METHYLATED_IN_LIVER_CANCER_UP
TPO	thyroid peroxidase	MEMBRANE		INTEGRAL_TO_MEMBRANE	INTRINSIC_TO_MEMBRANE				MEMBRANE_PART					ACEVEDO_METHYLATED_IN_LIVER_CANCER_DN			KEGG_TYROSINE_METABOLISM	INTEGRAL_TO_PLASMA_MEMBRANE	INTRINSIC_TO_PLASMA_MEMBRANE											PLASMA_MEMBRANE							PLASMA_MEMBRANE_PART											MORF_PTPRB
GPR98	G protein-coupled receptor 98	MEMBRANE		INTEGRAL_TO_MEMBRANE	INTRINSIC_TO_MEMBRANE				MEMBRANE_PART					ACEVEDO_METHYLATED_IN_LIVER_CANCER_DN									SYSTEM_PROCESS												CYTOPLASM
EPHA3	EPH receptor A3	MEMBRANE		INTEGRAL_TO_MEMBRANE	INTRINSIC_TO_MEMBRANE				MEMBRANE_PART									INTEGRAL_TO_PLASMA_MEMBRANE	INTRINSIC_TO_PLASMA_MEMBRANE								GTGCCAA,MIR-96			PLASMA_MEMBRANE						DING_LUNG_CANCER_MUTATED_SIGNIFICANTLY	PLASMA_MEMBRANE_PART								ATACCTC,MIR-202	CATGTAA,MIR-496
SLC7A1	solute carrier family 7 (cationic amino acid transporter, y+ system), member 1	MEMBRANE		INTEGRAL_TO_MEMBRANE	INTRINSIC_TO_MEMBRANE				MEMBRANE_PART									INTEGRAL_TO_PLASMA_MEMBRANE	INTRINSIC_TO_PLASMA_MEMBRANE											PLASMA_MEMBRANE				CTAWWWATA_V$RSRFC4_Q2			PLASMA_MEMBRANE_PART				SENESE_HDAC3_TARGETS_UP			BIOCARTA_NO1_PATHWAY
CLCA4	chloride channel, calcium activated, family member 4	MEMBRANE		INTEGRAL_TO_MEMBRANE	INTRINSIC_TO_MEMBRANE				MEMBRANE_PART									INTEGRAL_TO_PLASMA_MEMBRANE	INTRINSIC_TO_PLASMA_MEMBRANE											PLASMA_MEMBRANE							PLASMA_MEMBRANE_PART					TATAAA_V$TATA_01
ARFGEF2	ADP-ribosylation factor guanine nucleotide-exchange factor 2 (brefeldin A-inhibited)	MEMBRANE							MEMBRANE_PART							MORF_ARL3				MORF_MAGEA9															CYTOPLASM			MORF_FOSL1											MORF_PPP2R5B
OXA1L	oxidase (cytochrome c) assembly 1-like	MEMBRANE							MEMBRANE_PART																										CYTOPLASM
SDHD	succinate dehydrogenase complex, subunit D, integral membrane protein	MEMBRANE										ACEVEDO_METHYLATED_IN_LIVER_CANCER_UP														MYLLYKANGAS_AMPLIFICATION_HOT_SPOT_23									CYTOPLASM
UTRN	utrophin (homologous to dystrophin)	MEMBRANE																					SYSTEM_PROCESS							PLASMA_MEMBRANE								MORF_FOSL1		module_13		TATAAA_V$TATA_01
RYR2	ryanodine receptor 2 (cardiac)	MEMBRANE																					SYSTEM_PROCESS							PLASMA_MEMBRANE														BIOCARTA_NO1_PATHWAY
PLXNA2	plexin A2					module_11	module_100	module_137		module_66	CAGGTG_V$E12_Q6	ACEVEDO_METHYLATED_IN_LIVER_CANCER_UP																														TATAAA_V$TATA_01
UBE2D1	ubiquitin-conjugating enzyme E2D 1 (UBC4/5 homolog, yeast)					module_11	module_100	module_137		module_66	CAGGTG_V$E12_Q6			ACEVEDO_METHYLATED_IN_LIVER_CANCER_DN															REACTOME_SIGNALING_BY_BMP											module_13
SV2B	synaptic vesicle glycoprotein 2B					module_11	module_100	module_137		module_66	CAGGTG_V$E12_Q6			ACEVEDO_METHYLATED_IN_LIVER_CANCER_DN
MTHFR	5,10-methylenetetrahydrofolate reductase (NADPH)					module_11	module_100	module_137		module_66	CAGGTG_V$E12_Q6												SYSTEM_PROCESS																	module_13							module_104
SV2A	synaptic vesicle glycoprotein 2A					module_11	module_100	module_137		module_66	CAGGTG_V$E12_Q6																							CTAWWWATA_V$RSRFC4_Q2	CYTOPLASM
CHN2	chimerin (chimaerin) 2					module_11	module_100	module_137		module_66		ACEVEDO_METHYLATED_IN_LIVER_CANCER_UP																					REACTOME_RHO_GTPASE_CYCLE	CTAWWWATA_V$RSRFC4_Q2											ATACCTC,MIR-202
PRPF6	PRP6 pre-mRNA processing factor 6 homolog (S. cerevisiae)					module_11	module_100	module_137		module_66		ACEVEDO_METHYLATED_IN_LIVER_CANCER_UP																													SENESE_HDAC3_TARGETS_UP
FAT2	FAT tumor suppressor homolog 2 (Drosophila)					module_11	module_100	module_137		module_66				ACEVEDO_METHYLATED_IN_LIVER_CANCER_DN																										module_13							module_104
RALGPS1	Ral GEF with PH domain and SH3 binding motif 1					module_11	module_100	module_137		module_66																	GTGCCAA,MIR-96
APOD	apolipoprotein D					module_11	module_100	module_137		module_66																																TATAAA_V$TATA_01
CNTNAP2	contactin associated protein-like 2					module_11	module_100	module_137		module_66																																				CATGTAA,MIR-496
PRDM10	PR domain containing 10										CAGGTG_V$E12_Q6	ACEVEDO_METHYLATED_IN_LIVER_CANCER_UP																																		CATGTAA,MIR-496
PIK3CG	phosphoinositide-3-kinase, catalytic, gamma polypeptide										CAGGTG_V$E12_Q6	ACEVEDO_METHYLATED_IN_LIVER_CANCER_UP
ARHGEF12	Rho guanine nucleotide exchange factor (GEF) 12										CAGGTG_V$E12_Q6				REACTOME_P75_NTR_RECEPTOR_MEDIATED_SIGNALLING					MORF_MAGEA9	REACTOME_NRAGE_SIGNALS_DEATH_THROUGH_JNK	REACTOME_G_ALPHA_12_13_SIGNALLING_EVENTS				MYLLYKANGAS_AMPLIFICATION_HOT_SPOT_23	GTGCCAA,MIR-96	REACTOME_CELL_DEATH_SIGNALLING_VIA_NRAGE_NRIF_AND_NADE					REACTOME_RHO_GTPASE_CYCLE
SMURF2	SMAD specific E3 ubiquitin protein ligase 2										CAGGTG_V$E12_Q6																		REACTOME_SIGNALING_BY_BMP
CLIC4	chloride intracellular channel 4										CAGGTG_V$E12_Q6																								CYTOPLASM
PRSS1	protease, serine, 1 (trypsin 1)										CAGGTG_V$E12_Q6																															TATAAA_V$TATA_01
NRK	Nik related kinase										CAGGTG_V$E12_Q6																																		ATACCTC,MIR-202
COL2A1	collagen, type II, alpha 1 (primary osteoarthritis, spondyloepiphyseal dysplasia, congenital)										CAGGTG_V$E12_Q6																																				module_104
SLITRK3	SLIT and NTRK-like family, member 3										CAGGTG_V$E12_Q6
UNC5B	unc-5 homolog B (C. elegans)										CAGGTG_V$E12_Q6
ADAMTS20	ADAM metallopeptidase with thrombospondin type 1 motif, 20										CAGGTG_V$E12_Q6
L3MBTL2	l(3)mbt-like 2 (Drosophila)										CAGGTG_V$E12_Q6
NBPF10	neuroblastoma breakpoint family, member 10											ACEVEDO_METHYLATED_IN_LIVER_CANCER_UP		ACEVEDO_METHYLATED_IN_LIVER_CANCER_DN																											SENESE_HDAC3_TARGETS_UP
RASGRF1	Ras protein-specific guanine nucleotide-releasing factor 1											ACEVEDO_METHYLATED_IN_LIVER_CANCER_UP			REACTOME_P75_NTR_RECEPTOR_MEDIATED_SIGNALLING						REACTOME_NRAGE_SIGNALS_DEATH_THROUGH_JNK	REACTOME_G_ALPHA_12_13_SIGNALLING_EVENTS						REACTOME_CELL_DEATH_SIGNALLING_VIA_NRAGE_NRIF_AND_NADE					REACTOME_RHO_GTPASE_CYCLE	CTAWWWATA_V$RSRFC4_Q2							SENESE_HDAC3_TARGETS_UP
SCN7A	sodium channel, voltage-gated, type VII, alpha											ACEVEDO_METHYLATED_IN_LIVER_CANCER_UP				MORF_ARL3				MORF_MAGEA9			SYSTEM_PROCESS	MORF_BCL2L11														MORF_FOSL1	MORF_MYL3				MORF_ERCC4					MORF_PTPRB
MEN1	multiple endocrine neoplasia I											ACEVEDO_METHYLATED_IN_LIVER_CANCER_UP														MYLLYKANGAS_AMPLIFICATION_HOT_SPOT_23									CYTOPLASM
KIAA2018	KIAA2018											ACEVEDO_METHYLATED_IN_LIVER_CANCER_UP															GTGCCAA,MIR-96
ZFHX4	zinc finger homeodomain 4											ACEVEDO_METHYLATED_IN_LIVER_CANCER_UP															GTGCCAA,MIR-96
NDRG2	NDRG family member 2											ACEVEDO_METHYLATED_IN_LIVER_CANCER_UP																						CTAWWWATA_V$RSRFC4_Q2								TATAAA_V$TATA_01					module_104
PSD4	pleckstrin and Sec7 domain containing 4											ACEVEDO_METHYLATED_IN_LIVER_CANCER_UP																												module_13
MDC1	mediator of DNA damage checkpoint 1											ACEVEDO_METHYLATED_IN_LIVER_CANCER_UP																												module_13
PCDHGA11	protocadherin gamma subfamily A, 11											ACEVEDO_METHYLATED_IN_LIVER_CANCER_UP																														TATAAA_V$TATA_01
APLP2	amyloid beta (A4) precursor-like protein 2											ACEVEDO_METHYLATED_IN_LIVER_CANCER_UP
A1BG	alpha-1-B glycoprotein											ACEVEDO_METHYLATED_IN_LIVER_CANCER_UP
PCNXL2	pecanex-like 2 (Drosophila)											ACEVEDO_METHYLATED_IN_LIVER_CANCER_UP
TAOK1	TAO kinase 1											ACEVEDO_METHYLATED_IN_LIVER_CANCER_UP
VPS53	vacuolar protein sorting 53 (S. cerevisiae)											ACEVEDO_METHYLATED_IN_LIVER_CANCER_UP
TAF1C	TATA box binding protein (TBP)-associated factor, RNA polymerase I, C, 110kDa											ACEVEDO_METHYLATED_IN_LIVER_CANCER_UP
FGD3	FYVE, RhoGEF and PH domain containing 3													ACEVEDO_METHYLATED_IN_LIVER_CANCER_DN	REACTOME_P75_NTR_RECEPTOR_MEDIATED_SIGNALLING						REACTOME_NRAGE_SIGNALS_DEATH_THROUGH_JNK	REACTOME_G_ALPHA_12_13_SIGNALLING_EVENTS						REACTOME_CELL_DEATH_SIGNALLING_VIA_NRAGE_NRIF_AND_NADE					REACTOME_RHO_GTPASE_CYCLE		CYTOPLASM
SORCS3	sortilin-related VPS10 domain containing receptor 3													ACEVEDO_METHYLATED_IN_LIVER_CANCER_DN	REACTOME_P75_NTR_RECEPTOR_MEDIATED_SIGNALLING
ASTN2	astrotactin 2													ACEVEDO_METHYLATED_IN_LIVER_CANCER_DN
ECHDC2	enoyl Coenzyme A hydratase domain containing 2													ACEVEDO_METHYLATED_IN_LIVER_CANCER_DN
DPCR1	diffuse panbronchiolitis critical region 1													ACEVEDO_METHYLATED_IN_LIVER_CANCER_DN
UMODL1	uromodulin-like 1													ACEVEDO_METHYLATED_IN_LIVER_CANCER_DN
ZNF595	zinc finger protein 595													ACEVEDO_METHYLATED_IN_LIVER_CANCER_DN
AKAP13	A kinase (PRKA) anchor protein 13														REACTOME_P75_NTR_RECEPTOR_MEDIATED_SIGNALLING						REACTOME_NRAGE_SIGNALS_DEATH_THROUGH_JNK	REACTOME_G_ALPHA_12_13_SIGNALLING_EVENTS						REACTOME_CELL_DEATH_SIGNALLING_VIA_NRAGE_NRIF_AND_NADE					REACTOME_RHO_GTPASE_CYCLE												ATACCTC,MIR-202
IVL	involucrin															MORF_ARL3				MORF_MAGEA9				MORF_BCL2L11								MORF_CD8A			CYTOPLASM			MORF_FOSL1		module_13		TATAAA_V$TATA_01	MORF_ERCC4				module_104		MORF_PPP2R5B
EXOC4	exocyst complex component 4															MORF_ARL3				MORF_MAGEA9				MORF_BCL2L11								MORF_CD8A			CYTOPLASM			MORF_FOSL1					MORF_ERCC4					MORF_PTPRB	MORF_PPP2R5B
S100A5	S100 calcium binding protein A5															MORF_ARL3				MORF_MAGEA9				MORF_BCL2L11								MORF_CD8A						MORF_FOSL1	MORF_MYL3	module_13			MORF_ERCC4				module_104	MORF_PTPRB	MORF_PPP2R5B
GNPAT	glyceronephosphate O-acyltransferase															MORF_ARL3				MORF_MAGEA9				MORF_BCL2L11											CYTOPLASM			MORF_FOSL1					MORF_ERCC4
ADH1B	alcohol dehydrogenase IB (class I), beta polypeptide																KEGG_TYROSINE_METABOLISM								OXIDOREDUCTASE_ACTIVITY_GO_0016616						OXIDOREDUCTASE_ACTIVITY_ACTING_ON_CH_OH_GROUP_OF_DONORS
ADH7	alcohol dehydrogenase 7 (class IV), mu or sigma polypeptide																KEGG_TYROSINE_METABOLISM								OXIDOREDUCTASE_ACTIVITY_GO_0016616						OXIDOREDUCTASE_ACTIVITY_ACTING_ON_CH_OH_GROUP_OF_DONORS
TYRP1	tyrosinase-related protein 1																KEGG_TYROSINE_METABOLISM
DFNB31	deafness, autosomal recessive 31																						SYSTEM_PROCESS												CYTOPLASM
RTP4	receptor transporter protein 4																						SYSTEM_PROCESS												CYTOPLASM
IDH1	isocitrate dehydrogenase 1 (NADP+), soluble																								OXIDOREDUCTASE_ACTIVITY_GO_0016616						OXIDOREDUCTASE_ACTIVITY_ACTING_ON_CH_OH_GROUP_OF_DONORS				CYTOPLASM
ME2	malic enzyme 2, NAD(+)-dependent, mitochondrial																								OXIDOREDUCTASE_ACTIVITY_GO_0016616						OXIDOREDUCTASE_ACTIVITY_ACTING_ON_CH_OH_GROUP_OF_DONORS
CNTN1	contactin 1																																	CTAWWWATA_V$RSRFC4_Q2						module_13		TATAAA_V$TATA_01
TP53	tumor protein p53 (Li-Fraumeni syndrome)																																		CYTOPLASM	DING_LUNG_CANCER_MUTATED_SIGNIFICANTLY
CDC27	cell division cycle 27																																		CYTOPLASM						SENESE_HDAC3_TARGETS_UP
IGF2BP3	insulin-like growth factor 2 mRNA binding protein 3																																		CYTOPLASM						SENESE_HDAC3_TARGETS_UP
SPTA1	spectrin, alpha, erythrocytic 1 (elliptocytosis 2)																																		CYTOPLASM							TATAAA_V$TATA_01
CROCC	ciliary rootlet coiled-coil, rootletin																																		CYTOPLASM
C16ORF46	chromosome 16 open reading frame 46																																								SENESE_HDAC3_TARGETS_UP
SLC26A7	solute carrier family 26, member 7																																									TATAAA_V$TATA_01				CATGTAA,MIR-496
ZNF536	zinc finger protein 536																																													CATGTAA,MIR-496
HYAL3	hyaluronoglucosaminidase 3
C2ORF16	chromosome 2 open reading frame 16
EIF2C3	eukaryotic translation initiation factor 2C, 3
THNSL1	threonine synthase-like 1 (bacterial)
XPO6	exportin 6
MCM8	MCM8 minichromosome maintenance deficient 8 (S. cerevisiae)
CA8	carbonic anhydrase VIII
ZNF257	zinc finger protein 257
ESX1	extraembryonic, spermatogenesis, homeobox 1 homolog (mouse)
NAT10	N-acetyltransferase 10
RRM1	ribonucleotide reductase M1 polypeptide
DNAH5	dynein, axonemal, heavy chain 5
YEATS2	YEATS domain containing 2
DHRS4L2	dehydrogenase/reductase (SDR family) member 4 like 2
ASCC3	activating signal cointegrator 1 complex subunit 3
KIAA0556	KIAA0556
PRKAG3	protein kinase, AMP-activated, gamma 3 non-catalytic subunit
HCST	hematopoietic cell signal transducer
WDR37	WD repeat domain 37
DYNC1H1	dynein, cytoplasmic 1, heavy chain 1
TLR9	toll-like receptor 9
TRIM69	tripartite motif-containing 69
ZNF709	zinc finger protein 709
TMEM132B	transmembrane protein 132B
KIAA0754	-
WDR65	WD repeat domain 65
KRTAP19-5	keratin associated protein 19-5
MEIS3	Meis1, myeloid ecotropic viral integration site 1 homolog 3 (mouse)
HSF5	heat shock transcription factor family member 5
[truncated: 2 more columns]
