# Supplementary material for: Unique mutation portraits and frequent COL2A1 gene alteration in chondrosarcoma
Source: HighWire-hosted journal article supplement (doi:10.1101/gr.160598.113), 2014-07-14
Supplement: Supp_Table_S5.xlsx [file Supp_Table_S5.xlsx]

## Sheet: CS_cn_by_gene.segment
Sample	Gene	Accession#	Log2 ratio	Chromosome	Strand	Start	End
CS01T	LOC100130000	NR_033189	1.9508	chr1	+	143687130	143714180
CS02T	PLEKHG4B	NM_052909	2.1876	chr5	+	140373	190087
CS02T	LRRC14B	NM_001080478	2.1876	chr5	+	191626	195468
CS02T	CCDC127	NM_145265	2.1876	chr5	-	204875	218297
CS02T	SDHA	NM_004168	2.1876	chr5	+	218356	256814
CS02T	MIR4456	NR_039661	1.6087	chr5	-	535955	535997
CS02T	CEP72	NM_018140	1.6087	chr5	+	612405	653666
CS02T	TPPP	NM_007030	1.6087	chr5	-	659977	693510
CS02T	TERT	NM_001193376	1.6934	chr5	-	1253287	1295162
CS02T	TERT	NM_198253	1.6934	chr5	-	1253287	1295162
CS02T	MIR4457	NR_039662	1.6934	chr5	-	1309425	1309492
CS02T	CLPTM1L	NM_030782	1.6934	chr5	-	1318000	1345002
CS02T	SLC6A3	NM_001044	1.6934	chr5	-	1392905	1445543
CS02T	LPCAT1	NM_024830	1.6934	chr5	-	1461542	1524076
CS02T	SDHAP3	NR_003263	1.6934	chr5	-	1572073	1594646
CS02T	LOC728613	NR_003713	1.6934	chr5	-	1597672	1634120
CS02T	MIR4277	NR_036240	1.6934	chr5	-	1708900	1708983
CS02T	MRPL36	NM_032479	1.6934	chr5	-	1798499	1799956
CS02T	NDUFS6	NM_004553	1.6934	chr5	+	1801496	1816167
CS02T	IRX4	NM_016358	1.6934	chr5	-	1877541	1882880
CS02T	CTNND2	NM_001332	1.7175	chr5	-	10971952	11904110
CS02T	DNAH5	NM_001369	2.3486	chr5	-	13690437	13944589
CS02T	TRIO	NM_007118	2.0811	chr5	+	14143829	14509458
CS02T	FAM105A	NM_019018	2.0811	chr5	+	14581891	14616287
CS02T	FAM105B	NM_138348	2.0811	chr5	+	14664783	14699842
CS08T	RHOU	NR_037962	2.0707	chr1	+	228780394	228882416
CS08T	DUSP5P	NR_002834	2.0707	chr1	+	228780657	228788159
CS08T	LOC440297	NR_033579	2.5863	chr15	+	82753447	82769399
CS08T	LOC727849	NR_033936	2.5863	chr15	-	82763613	82798352
CS08T	AGSK1	NR_026811	2.5863	chr15	-	82764078	82798323
CS08T	LOC440297	NR_033579	2.3844	chr15	+	83130033	83145983
CS08T	LOC727849	NR_033936	2.3844	chr15	-	83140199	83182930
CS08T	AGSK1	NR_026811	2.3844	chr15	-	83140664	83182901
CS08T	RAB11FIP3	NM_014700	1.5858	chr16	+	475668	572481
CS08T	RAB11FIP3	NM_001142272	1.5858	chr16	+	524850	572481
CS08T	LINC00235	NR_024121	1.5858	chr16	-	576847	577407
CS08T	SOLH	NM_005632	1.5858	chr16	+	577856	604636
CS08T	MIR3176	NR_036137	1.5858	chr16	+	593277	593366
CS08T	C16orf11	NM_145270	1.5858	chr16	+	610422	615529
CS08T	NHLRC4	NM_176677	1.5858	chr16	+	617032	619495
CS08T	PIGQ	NM_004204	1.5858	chr16	+	619968	634136
CS08T	PIGQ	NM_148920	1.5858	chr16	+	620004	634109
CS08T	RAB40C	NM_001172663	1.5858	chr16	+	639357	679273
CS08T	RAB40C	NM_001172664	1.5858	chr16	+	639669	679273
CS08T	RAB40C	NM_001172665	1.5858	chr16	+	640077	679273
CS08T	RAB40C	NM_001172666	1.5858	chr16	+	640077	679273
CS08T	RAB40C	NM_021168	1.5858	chr16	+	640173	679273
CS08T	WFIKKN1	NM_053284	1.5858	chr16	+	681012	684116
CS08T	C16orf13	NM_001040160	1.5858	chr16	-	684429	686347
CS08T	C16orf13	NM_001040161	1.5858	chr16	-	684429	686347
CS08T	C16orf13	NM_001040162	1.5858	chr16	-	684429	686347
CS08T	C16orf13	NM_001040165	1.5858	chr16	-	684429	686347
CS08T	C16orf13	NM_032366	1.5858	chr16	-	684429	686347
CS08T	FAM195A	NM_138418	1.5858	chr16	+	691849	698474
CS08T	WDR90	NM_145294	1.5858	chr16	+	699363	717829
CS08T	RHOT2	NM_138769	1.5858	chr16	+	718083	724174
CS08T	RHBDL1	NM_003961	1.5858	chr16	+	726075	728267
CS08T	STUB1	NM_005861	1.5858	chr16	+	730115	732768
CS08T	JMJD8	NM_001005920	1.5858	chr16	-	731667	734439
CS08T	WDR24	NM_032259	1.5858	chr16	-	734702	740400
CS08T	FBXL16	NM_153350	1.5858	chr16	-	742500	755825
CS08T	METRN	NM_024042	1.5858	chr16	+	765173	767480
CS08T	FAM173A	NM_023933	1.5858	chr16	+	771158	772590
CS08T	CCDC78	NM_001031737	1.5858	chr16	-	772582	776473
CS08T	HAGHL	NM_032304	1.5858	chr16	+	777266	779715
CS08T	NARFL	NM_022493	1.5858	chr16	-	779769	790997
CS08T	MSLN	NM_005823	1.5858	chr16	+	810765	818865
CS08T	MSLN	NM_001177355	1.5858	chr16	+	810766	818865
CS08T	MSLN	NM_013404	1.5858	chr16	+	811073	818865
CS08T	MIR662	NR_030384	1.5858	chr16	+	820183	820277
CS08T	RPUSD1	NM_058192	1.5858	chr16	-	834974	838383
CS08T	CHTF18	NM_022092	1.5858	chr16	+	838622	848074
CS08T	GNG13	NM_016541	1.5858	chr16	-	848041	850733
CS08T	PRR25	NM_001013638	1.5858	chr16	+	855443	863861
CS08T	LOC146336	NR_027242	1.6338	chr16	-	1114082	1128731
CS08T	SSTR5	NM_001172560	1.6338	chr16	+	1122756	1131454
CS08T	SSTR5	NM_001053	1.6338	chr16	+	1128781	1131454
CS08T	C1QTNF8	NM_207419	1.6338	chr16	-	1138226	1146244
CS08T	CACNA1H	NM_001005407	1.6338	chr16	+	1203241	1271772
CS08T	CACNA1H	NM_021098	1.6338	chr16	+	1203241	1271772
CS08T	TPSG1	NM_012467	1.6338	chr16	-	1271651	1275254
CS08T	TPSB2	NM_024164	1.6338	chr16	-	1278336	1280185
CS08T	CORO7-PAM16	NM_001201479	1.7135	chr16	-	4390252	4466962
CS08T	CORO7	NM_001201472	1.7135	chr16	-	4404543	4466962
CS08T	CORO7	NM_001201473	1.7135	chr16	-	4404543	4466962
CS08T	CORO7	NM_024535	1.7135	chr16	-	4404543	4466962
CS08T	VASN	NM_138440	1.7135	chr16	+	4421849	4433529
CS08T	TRADD	NM_003789	1.7926	chr16	-	67188089	67193812
CS08T	FBXL8	NM_018378	1.7926	chr16	+	67193891	67198077
CS08T	HSF4	NM_001040667	1.7926	chr16	+	67197288	67203848
CS08T	HSF4	NM_001538	1.7926	chr16	+	67197288	67203848
CS08T	NOL3	NM_001185058	1.7926	chr16	+	67204405	67209643
CS08T	NOL3	NM_003946	1.7926	chr16	+	67207756	67209643
CS08T	NOL3	NM_001185057	1.7926	chr16	+	67207765	67209643
CS08T	KIAA0895L	NM_001040715	1.7926	chr16	-	67209505	67217883
CS08T	EXOC3L1	NM_178516	1.7926	chr16	-	67218282	67224107
CS08T	E2F4	NM_001950	1.7926	chr16	+	67226068	67232821
CS08T	ELMO3	NM_024712	1.7926	chr16	+	67233028	67237927
CS08T	MIR328	NR_029887	1.7926	chr16	-	67236224	67236298
CS08T	LRRC29	NM_001004055	1.7926	chr16	-	67241042	67260901
CS08T	LRRC29	NM_012163	1.7926	chr16	-	67241042	67260721
CS08T	TMEM208	NM_014187	1.7926	chr16	+	67261016	67263182
CS08T	FHOD1	NM_013241	1.7926	chr16	-	67263292	67281425
CS08T	SLC9A5	NM_004594	1.7926	chr16	+	67282855	67306094
CS08T	PLEKHG4	NM_015432	1.7926	chr16	+	67311413	67323403
CS08T	PLEKHG4	NM_001129727	1.7926	chr16	+	67312076	67323403
CS08T	PLEKHG4	NM_001129728	1.7926	chr16	+	67313050	67323403
CS08T	PLEKHG4	NM_001129729	1.7926	chr16	+	67313489	67323403
CS08T	PLEKHG4	NM_001129731	1.7926	chr16	+	67313492	67323403
CS08T	KCTD19	NM_001100915	1.7926	chr16	-	67323393	67360661
CS08T	ZDHHC1	NM_013304	1.6597	chr16	-	67428322	67450339
CS08T	HSD11B2	NM_000196	1.6597	chr16	+	67465036	67471454
CS08T	ATP6V0D1	NM_004691	1.6597	chr16	-	67471917	67515089
CS08T	AGRP	NM_001138	1.6597	chr16	-	67516474	67517716
CS08T	VAC14	NM_018052	2.047	chr16	-	70721342	70835061
CS08T	LOC100134317	NR_029389	2.1964	chr19	+	36802245	36803570
CS08T	LOC100506930	NR_038279	2.1964	chr19	-	36803963	36822620
CS08T	PRPF31	NM_015629	2.0314	chr19	+	54618790	54635150
CS08T	CNOT3	NM_014516	2.0314	chr19	+	54641436	54659446
CS08T	LENG1	NM_024316	2.0314	chr19	-	54659379	54663446
CS08T	TMC4	NM_001145303	2.0314	chr19	-	54663834	54676944
CS08T	TMC4	NM_144686	2.0314	chr19	-	54663834	54676944
CS08T	MBOAT7	NM_001146056	2.0314	chr19	-	54677106	54693733
CS08T	MBOAT7	NM_001146083	2.0314	chr19	-	54677106	54693733
CS08T	MBOAT7	NM_024298	2.0314	chr19	-	54677106	54693733
CS09T	XAGE2	NM_130777	1.6951	chrX	-	52380352	52387096
CS09T	XAGE2B	NM_001079538	1.6951	chrX	-	52380440	52386016
CS10T	LOC100134317	NR_029389	1.6485	chr19	+	36802245	36803570
CS10T	LOC100506930	NR_038279	1.6485	chr19	-	36803963	36822620
CS10T	CFC1B	NM_001079530	2.6793	chr2	+	131278667	131285565
CS10T	CFC1	NM_032545	2.6793	chr2	+	131278836	131285583
CS10T	LOC150527	NR_027314	2.6793	chr2	-	131294143	131307468
CS10T	LOC646743	NR_033930	2.6793	chr2	-	131294143	131307488
CS10T	TISP43	NR_027313	2.6793	chr2	-	131294143	131307471
CS10T	POTED	NM_174981	1.8975	chr21	+	14982498	15013906
CS10T	C21orf15	NR_026755	1.8975	chr21	-	15215454	15220685
CS10T	ANKRD20A11P	NR_027270	1.8975	chr21	-	15316096	15352765
CS10T	LIPI	NM_198996	1.8975	chr21	-	15481135	15579254
CS10T	RBM11	NM_144770	1.8975	chr21	+	15588466	15600693
CS10T	ABCC13	NR_003087	1.8975	chr21	+	15646120	15673692
CS10T	ABCC13	NR_003088	1.8975	chr21	+	15646120	15663706
CS10T	HSPA13	NM_006948	1.8975	chr21	-	15743437	15755509
CS10T	SAMSN1	NM_001256370	1.8975	chr21	-	15857549	15955723
CS10T	SAMSN1	NM_022136	1.8975	chr21	-	15857549	15918681
CS10T	LOC388813	NM_001256579	1.8975	chr21	-	15964484	16015428
CS10T	NRIP1	NM_003489	1.8975	chr21	-	16333556	16437126
CS10T	USP25	NM_013396	1.8975	chr21	+	17102496	17252377
CS10T	LINC00478	NR_027790	1.8975	chr21	+	17442842	17982094
CS10T	LINC00478	NR_027791	1.8975	chr21	+	17566699	17982094
CS10T	MIR99A	NR_029514	1.8975	chr21	+	17911409	17911489
CS10T	MIRLET7C	NR_029480	1.8975	chr21	+	17912148	17912231
CS10T	MIR125B2	NR_029694	1.8975	chr21	+	17962557	17962645
CS10T	C21orf37	NR_037585	1.8975	chr21	+	18811208	18821503
CS10T	C21orf37	NR_037586	1.8975	chr21	+	18811208	18821503
CS10T	CXADR	NM_001207063	1.8975	chr21	+	18885224	18942429
CS10T	CXADR	NM_001207064	1.8975	chr21	+	18885224	18942429
CS10T	CXADR	NM_001207065	1.8975	chr21	+	18885224	18942429
CS10T	CXADR	NM_001207066	1.8975	chr21	+	18885224	18965897
CS10T	CXADR	NM_001338	1.8975	chr21	+	18885224	18942429
CS10T	BTG3	NM_001130914	1.8975	chr21	-	18965968	18985268
CS10T	BTG3	NM_006806	1.8975	chr21	-	18965968	18985268
CS10T	C21orf91-OT1	NR_038870	1.8975	chr21	-	19149721	19164826
CS10T	C21orf91-OT1	NR_038871	1.8975	chr21	-	19149721	19164826
CS10T	C21orf91	NM_001100420	1.8975	chr21	-	19161284	19191703
CS10T	C21orf91	NM_001100421	1.8975	chr21	-	19161284	19191703
CS10T	C21orf91	NM_017447	1.8975	chr21	-	19161284	19191703
CS10T	CHODL-AS1	NR_024354	1.8975	chr21	-	19207989	19257925
CS10T	CHODL	NM_001204175	1.8975	chr21	+	19289657	19639687
CS10T	CHODL	NM_001204176	1.8975	chr21	+	19289657	19639687
CS10T	CHODL	NM_001204177	1.8975	chr21	+	19289657	19639687
CS10T	CHODL	NM_001204178	1.8975	chr21	+	19289657	19639687
CS10T	CHODL	NM_024944	1.8975	chr21	+	19617150	19639687
CS10T	CHODL	NM_001204174	1.8975	chr21	+	19618192	19639687
CS10T	TMPRSS15	NM_002772	1.8975	chr21	-	19641433	19775970
CS10T	LINC00320	NR_024090	1.8975	chr21	-	22114913	22175426
CS10T	NCAM2	NM_004540	1.8975	chr21	+	22370633	22912517
CS10T	LINC00317	NR_038872	1.8975	chr21	-	23095613	23109639
CS10T	LINC00308	NR_038400	1.8975	chr21	+	23470936	23488847
CS10T	D21S2088E	NR_040254	1.8975	chr21	-	24733426	24757156
CS10T	LOC339622	NR_046198	1.8975	chr21	+	26212864	26430056
CS10T	LINC00158	NR_024027	1.8975	chr21	-	26758133	26804013
CS10T	MIR155HG	NR_001458	1.8975	chr21	+	26934457	26947480
CS10T	MIR155	NR_030784	1.8975	chr21	+	26946292	26946356
CS10T	LINC00515	NR_024092	1.8975	chr21	-	26955087	26955536
CS10T	MRPL39	NM_017446	1.8975	chr21	-	26957968	26979801
CS10T	MRPL39	NM_080794	1.8975	chr21	-	26957968	26979801
CS10T	JAM2	NM_021219	1.8975	chr21	+	27011589	27087235
CS10T	ATP5J	NM_001003696	1.8975	chr21	-	27096791	27107965
CS10T	ATP5J	NM_001003697	1.8975	chr21	-	27096791	27107965
CS10T	ATP5J	NM_001003701	1.8975	chr21	-	27096791	27107965
CS10T	ATP5J	NM_001003703	1.8975	chr21	-	27096791	27107965
CS10T	ATP5J	NM_001685	1.8975	chr21	-	27096791	27107965
CS10T	GABPA	NM_001197297	1.8975	chr21	+	27107258	27144771
CS10T	GABPA	NM_002040	1.8975	chr21	+	27107329	27144771
CS10T	APP	NM_000484	1.8975	chr21	-	27252861	27543138
CS10T	APP	NM_001136016	1.8975	chr21	-	27252861	27512708
CS10T	APP	NM_001136129	1.8975	chr21	-	27252861	27543138
CS10T	APP	NM_001136130	1.8975	chr21	-	27252861	27543138
CS10T	APP	NM_001136131	1.8975	chr21	-	27252861	27543446
CS10T	APP	NM_001204301	1.8975	chr21	-	27252861	27543138
CS10T	APP	NM_001204302	1.8975	chr21	-	27252861	27543138
CS10T	APP	NM_001204303	1.8975	chr21	-	27252861	27543138
CS10T	APP	NM_201413	1.8975	chr21	-	27252861	27543138
CS10T	APP	NM_201414	1.8975	chr21	-	27252861	27543138
CS10T	CYYR1	NM_052954	1.8975	chr21	-	27838528	27945581
CS10T	ADAMTS1	NM_006988	1.8975	chr21	-	28208606	28217728
CS10T	ADAMTS5	NM_007038	1.8975	chr21	-	28290231	28339439
CS10T	MIR4759	NR_039916	1.8975	chr21	+	28326280	28326362
CS10T	LINC00113	NR_024357	1.8975	chr21	+	29094698	29123552
CS10T	LINC00314	NR_027246	1.8975	chr21	+	29385682	29395528
CS10T	LINC00161	NR_026552	1.8975	chr21	+	29911640	29912677
CS10T	LINC00161	NR_026553	1.8975	chr21	+	29911640	29912677
CS10T	N6AMT1	NR_047510	1.8975	chr21	-	30244513	30257695
CS10T	N6AMT1	NM_013240	1.8975	chr21	-	30248386	30257695
CS10T	N6AMT1	NM_182749	1.8975	chr21	-	30248386	30257695
CS10T	LTN1	NM_015565	1.8975	chr21	-	30300466	30365277
CS10T	RWDD2B	NM_016940	1.8975	chr21	-	30378080	30391685
CS10T	USP16	NM_001001992	1.8975	chr21	+	30396938	30426807
CS10T	USP16	NM_001032410	1.8975	chr21	+	30396938	30426807
CS10T	USP16	NM_006447	1.8975	chr21	+	30396938	30426807
CS10T	CCT8	NM_006585	1.8975	chr21	-	30428648	30446010
CS10T	C21orf7	NM_020152	1.8975	chr21	+	30452873	30548202
CS10T	LINC00189	NR_027072	1.8975	chr21	+	30565801	30660526
CS10T	BACH1	NM_001186	1.8975	chr21	+	30671220	30718469
CS10T	BACH1	NM_206866	1.8975	chr21	+	30671737	30718469
CS10T	BACH1	NR_027655	1.8975	chr21	+	30677560	30734217
CS10T	GRIK1	NM_175611	1.8975	chr21	-	30909254	31312282
CS10T	GRIK1	NM_000830	1.8975	chr21	-	30925866	31312282
CS10T	GRIK1-AS2	NR_033368	1.8975	chr21	+	30968360	31003067
CS10T	GRIK1-AS1	NR_027021	1.8975	chr21	+	31120494	31136325
CS10T	CLDN17	NM_012131	1.8975	chr21	-	31538241	31538971
CS10T	LINC00307	NR_038855	1.8975	chr21	-	31581469	31584101
CS10T	CLDN8	NM_199328	1.8975	chr21	-	31586324	31588469
CS10T	KRTAP24-1	NM_001085455	1.8975	chr21	-	31653627	31655276
CS10T	KRTAP25-1	NM_001128598	1.8975	chr21	-	31661463	31661832
CS10T	KRTAP26-1	NM_203405	1.8975	chr21	-	31691450	31692607
CS10T	KRTAP27-1	NM_001077711	1.8975	chr21	-	31709331	31710012
CS10T	KRTAP23-1	NM_181624	1.8975	chr21	-	31720717	31720924
CS10T	KRTAP13-2	NM_181621	1.8975	chr21	-	31743709	31744557
CS10T	MIR4327	NR_036221	1.8975	chr21	-	31747612	31747696
CS10T	KRTAP13-1	NM_181599	1.8975	chr21	+	31768392	31769138
CS10T	KRTAP13-3	NM_181622	1.8975	chr21	-	31797711	31798230
CS10T	KRTAP13-4	NM_181600	1.8975	chr21	+	31802594	31803076
CS10T	KRTAP15-1	NM_181623	1.8975	chr21	+	31812646	31813098
CS10T	KRTAP19-1	NM_181607	1.8975	chr21	-	31852364	31852636
CS10T	KRTAP19-2	NM_181608	1.8975	chr21	-	31859509	31859667
CS10T	KRTAP19-3	NM_181609	1.8975	chr21	-	31863782	31864275
CS10T	KRTAP19-4	NM_181610	1.8975	chr21	-	31869174	31869428
CS10T	KRTAP19-5	NM_181611	1.8975	chr21	-	31874190	31874408
CS10T	KRTAP19-6	NM_181612	1.8975	chr21	-	31913854	31914181
CS10T	KRTAP19-7	NM_181614	1.8975	chr21	-	31933417	31933608
CS10T	KRTAP22-2	NM_001164434	1.8975	chr21	-	31962424	31962716
CS10T	KRTAP6-3	NM_181605	1.8975	chr21	+	31964759	31965374
CS10T	KRTAP6-2	NM_181604	1.8975	chr21	-	31971005	31971193
CS10T	KRTAP22-1	NM_181620	1.8975	chr21	+	31973440	31973586
CS10T	KRTAP6-1	NM_181602	1.8975	chr21	-	31986005	31986223
CS10T	KRTAP20-1	NM_181615	1.8975	chr21	+	31988774	31988944
CS10T	KRTAP20-4	NR_023342	1.8975	chr21	+	31992946	31993169
CS10T	KRTAP20-2	NM_181616	1.8975	chr21	+	32007583	32007780
CS10T	KRTAP20-3	NM_001128077	1.8975	chr21	+	32015183	32015455
CS10T	KRTAP21-3	NM_001164435	1.8975	chr21	-	32090843	32091095
CS10T	KRTAP21-2	NM_181617	1.8975	chr21	-	32119269	32119520
CS10T	KRTAP21-1	NM_181619	1.8975	chr21	-	32127457	32127696
CS10T	KRTAP8-1	NM_175857	1.8975	chr21	-	32185015	32185570
CS10T	KRTAP7-1	NM_181606	1.8975	chr21	-	32201358	32202051
CS10T	KRTAP11-1	NM_175858	1.8975	chr21	-	32252964	32253874
CS10T	KRTAP19-8	NM_001099219	1.8975	chr21	-	32410478	32410795
CS10T	TIAM1	NM_003253	1.8975	chr21	-	32490736	32931290
CS10T	SOD1	NM_000454	1.8975	chr21	+	33031935	33041243
CS10T	SCAF4	NM_001145444	1.8975	chr21	-	33043313	33104431
CS10T	SCAF4	NM_001145445	1.8975	chr21	-	33043313	33104431
CS10T	SCAF4	NM_020706	1.8975	chr21	-	33043313	33104431
CS10T	HUNK	NM_014586	1.8975	chr21	+	33245628	33376377
CS10T	LINC00159	NR_038033	1.8975	chr21	-	33452794	33458608
CS10T	MIS18A	NM_018944	1.8975	chr21	-	33640530	33651376
CS10T	MRAP	NM_178817	1.8975	chr21	+	33664124	33684599
CS10T	MRAP	NM_206898	1.8975	chr21	+	33664124	33687094
CS10T	URB1	NM_014825	1.8975	chr21	-	33683330	33765312
CS10T	SNORA80	NR_002996	1.8975	chr21	-	33749496	33749631
CS10T	C21orf119	NR_026845	1.8975	chr21	+	33765442	33766266
CS10T	FAM176C	NM_058187	1.8975	chr21	+	33784752	33887697
CS10T	TCP10L	NM_144659	1.8975	chr21	-	33947151	33957845
CS10T	C21orf59	NM_021254	1.8975	chr21	-	33973984	33984918
CS10T	C21orf59	NR_036552	1.8975	chr21	-	33973984	33984913
CS10T	SYNJ1	NM_001160302	1.8975	chr21	-	34001069	34100250
CS10T	SYNJ1	NM_001160306	1.8975	chr21	-	34001069	34100250
CS10T	SYNJ1	NM_003895	1.8975	chr21	-	34001069	34100351
CS10T	SYNJ1	NM_203446	1.8975	chr21	-	34001069	34100351
CS10T	GCFC1-AS1	NR_038879	1.8975	chr21	+	34100425	34115433
CS10T	GCFC1-AS1	NR_038880	1.8975	chr21	+	34100425	34105224
CS10T	GCFC1	NM_016631	1.8975	chr21	-	34106210	34144169
CS10T	GCFC1	NR_027873	1.8975	chr21	-	34106210	34144169
CS10T	GCFC1	NM_013329	1.8975	chr21	-	34113650	34144169
CS10T	C21orf49	NR_024622	1.8975	chr21	+	34144411	34170016
CS10T	C21orf49	NR_024623	1.8975	chr21	+	34144411	34170016
CS10T	C21orf62	NM_001162495	1.8975	chr21	-	34162984	34186053
CS10T	C21orf62	NM_001162496	1.8975	chr21	-	34162984	34186053
CS10T	C21orf62	NM_019596	1.8975	chr21	-	34162984	34186053
CS10T	OLIG2	NM_005806	1.8975	chr21	+	34398216	34401503
CS10T	OLIG1	NM_138983	1.8975	chr21	+	34442450	34444728
CS10T	C21orf54	NR_024102	1.8975	chr21	-	34537776	34542541
CS10T	IFNAR2	NM_000874	1.8975	chr21	+	34602231	34635062
CS10T	IFNAR2	NM_207584	1.8975	chr21	+	34602231	34635062
CS10T	IFNAR2	NM_207585	1.8975	chr21	+	34602231	34636820
CS10T	LOC100288432	NR_038974	1.8975	chr21	-	34637937	34638565
CS10T	IL10RB	NM_000628	1.8975	chr21	+	34638672	34669520
CS10T	IFNAR1	NM_000629	1.8975	chr21	+	34697214	34732128
CS10T	IFNGR2	NM_005534	1.8975	chr21	+	34775202	34809828
CS10T	TMEM50B	NR_040016	1.8975	chr21	-	34804793	34852316
CS10T	TMEM50B	NM_006134	1.8975	chr21	-	34821448	34852316
CS10T	DNAJC28	NM_001040192	1.8975	chr21	-	34860238	34864023
CS10T	DNAJC28	NM_017833	1.8975	chr21	-	34860238	34863790
CS10T	GART	NM_000819	1.8975	chr21	-	34876238	34914464
CS10T	GART	NM_001136005	1.8975	chr21	-	34876238	34915195
CS10T	GART	NM_001136006	1.8975	chr21	-	34876238	34915198
CS10T	GART	NM_175085	1.8975	chr21	-	34896316	34914464
CS10T	SON	NM_032195	1.8975	chr21	+	34915350	34932973
CS10T	SON	NM_138927	1.8975	chr21	+	34915350	34949812
CS10T	DONSON	NM_017613	1.8975	chr21	-	34950211	34961014
CS10T	CRYZL1	NM_145858	1.8975	chr21	-	34961648	35014160
CS10T	ITSN1	NM_001001132	1.8975	chr21	+	35014784	35210802
CS10T	ITSN1	NM_003024	1.8975	chr21	+	35014784	35261609
CS10T	ATP5O	NM_001697	1.8975	chr21	-	35275757	35288158
CS10T	LOC100506334	NR_038883	1.8975	chr21	+	35303516	35343487
CS10T	MRPS6	NM_032476	1.8975	chr21	+	35445823	35515334
CS10T	SLC5A3	NM_006933	1.8975	chr21	+	35445870	35478561
CS10T	LINC00310	NR_027266	1.8975	chr21	+	35552978	35562220
CS10T	LINC00310	NR_027267	1.8975	chr21	+	35552978	35555546
CS10T	KCNE2	NM_172201	1.8975	chr21	+	35736323	35743440
CS10T	FAM165B	NM_058182	1.8975	chr21	+	35747749	35761452
CS10T	KCNE1	NM_000219	1.8975	chr21	-	35818988	35883613
CS10T	KCNE1	NM_001127668	1.8975	chr21	-	35818988	35831902
CS10T	KCNE1	NM_001127669	1.8975	chr21	-	35818988	35831902
CS10T	KCNE1	NM_001127670	1.8975	chr21	-	35818988	35828063
CS10T	RCAN1	NM_004414	1.8975	chr21	-	35888784	35987382
CS10T	RCAN1	NM_203417	1.8975	chr21	-	35888784	35986745
CS10T	RCAN1	NM_203418	1.8975	chr21	-	35888784	35899261
CS10T	CLIC6	NM_053277	1.8975	chr21	+	36041688	36090519
CS10T	LINC00160	NR_024351	1.8975	chr21	+	36096105	36109479
CS10T	LOC100506385	NR_038885	1.8975	chr21	+	36118122	36157168
CS10T	LOC100506385	NR_038886	1.8975	chr21	+	36118122	36120664
CS10T	RUNX1	NM_001001890	1.8975	chr21	-	36160098	36260987
CS10T	RUNX1	NM_001754	1.8975	chr21	-	36160098	36421595
CS10T	RUNX1	NM_001122607	1.8975	chr21	-	36193574	36260987
CS10T	RUNX1-IT1	NR_026812	1.8975	chr21	-	36410233	36411723
CS10T	MIR802	NR_030414	1.8975	chr21	+	37093013	37093106
CS10T	SETD4	NM_017438	1.8975	chr21	-	37406839	37432816
CS10T	SETD4	NR_040087	1.8975	chr21	-	37406840	37432816
CS10T	SETD4	NR_040086	1.8975	chr21	-	37406841	37432819
CS10T	SETD4	NM_001007259	1.8975	chr21	-	37415982	37432611
CS10T	SETD4	NR_040088	1.8975	chr21	-	37415984	37432611
CS10T	LOC100133286	NR_040084	1.8975	chr21	-	37441940	37498938
CS10T	CBR1	NM_001757	1.8975	chr21	+	37442285	37445462
CS10T	CBR3-AS1	NR_038892	1.8975	chr21	-	37504065	37528606
CS10T	CBR3-AS1	NR_038893	1.8975	chr21	-	37504065	37528606
CS10T	CBR3	NM_001236	1.8975	chr21	+	37507263	37518860
CS10T	CBR3-AS1	NR_038894	1.8975	chr21	-	37513694	37528606
CS10T	DOPEY2	NM_005128	1.8975	chr21	+	37536839	37666572
CS10T	MORC3	NM_015358	1.8975	chr21	+	37692487	37748944
CS10T	CHAF1B	NM_005441	1.8975	chr21	+	37757689	37789125
CS10T	CLDN14	NM_001146077	1.8975	chr21	-	37832920	37948867
CS10T	CLDN14	NM_001146078	1.8975	chr21	-	37832920	37914898
CS10T	CLDN14	NM_001146079	1.8975	chr21	-	37832920	37852388
CS10T	CLDN14	NM_012130	1.8975	chr21	-	37832920	37838725
CS10T	CLDN14	NM_144492	1.8975	chr21	-	37832920	37852388
CS10T	SIM2	NM_005069	1.8975	chr21	+	38071991	38122510
CS10T	SIM2	NM_009586	1.8975	chr21	+	38071991	38118219
CS10T	HLCS	NM_000411	1.8975	chr21	-	38123189	38362545
CS10T	HLCS	NM_001242784	1.8975	chr21	-	38123189	38338956
CS10T	HLCS	NM_001242785	1.8975	chr21	-	38123189	38353264
CS10T	DSCR6	NM_018962	1.8975	chr21	+	38378863	38391958
CS10T	PIGP	NM_153681	1.8975	chr21	-	38437664	38445103
CS10T	PIGP	NM_153682	1.8975	chr21	-	38437664	38445458
CS10T	PIGP	NR_028352	1.8975	chr21	-	38437664	38445458
CS10T	TTC3	NM_001001894	1.8975	chr21	+	38445571	38575408
CS10T	TTC3	NM_003316	1.8975	chr21	+	38455247	38575408
CS10T	DSCR9	NR_026719	1.8975	chr21	+	38580804	38594037
CS10T	DSCR3	NM_006052	1.8975	chr21	-	38595726	38639833
CS10T	DYRK1A	NM_101395	1.8975	chr21	+	38739859	38887679
CS10T	DYRK1A	NM_130436	1.8975	chr21	+	38791207	38887679
CS10T	DYRK1A	NM_130438	1.8975	chr21	+	38792601	38887679
CS10T	DYRK1A	NM_001396	1.8975	chr21	+	38792602	38887679
CS10T	KCNJ6	NM_002240	1.8975	chr21	-	38996786	39288696
CS10T	DSCR4	NM_005867	1.8975	chr21	-	39426313	39493454
CS10T	DSCR8	NR_026838	1.8975	chr21	+	39493545	39528605
CS10T	DSCR8	NR_026839	1.8975	chr21	+	39493545	39528605
CS10T	DSCR8	NR_026840	1.8975	chr21	+	39493545	39528605
CS10T	DSCR8	NR_026841	1.8975	chr21	+	39493545	39528605
CS10T	DSCR8	NR_026842	1.8975	chr21	+	39493545	39528605
CS10T	DSCR10	NR_027695	1.8975	chr21	+	39578250	39580738
CS10T	KCNJ15	NM_002243	1.8975	chr21	+	39628664	39673746
CS10T	KCNJ15	NM_170736	1.8975	chr21	+	39628870	39673746
CS10T	KCNJ15	NM_170737	1.8975	chr21	+	39644429	39673746
CS10T	ERG	NM_001243432	1.8975	chr21	-	39739183	40033618
CS10T	ERG	NM_001136154	1.8975	chr21	-	39751950	40033704
CS10T	ERG	NM_001136155	1.8975	chr21	-	39751950	39870428
CS10T	ERG	NM_001243428	1.8975	chr21	-	39751950	40032591
CS10T	ERG	NM_001243429	1.8975	chr21	-	39751950	39956869
CS10T	ERG	NM_004449	1.8975	chr21	-	39751950	40033704
CS10T	ERG	NM_182918	1.8975	chr21	-	39751950	39870428
CS10T	LINC00114	NR_027067	1.8975	chr21	-	40110879	40124181
CS10T	LINC00114	NR_027065	1.8975	chr21	-	40110949	40145401
CS10T	LINC00114	NR_027066	1.8975	chr21	-	40110949	40140898
CS10T	ETS2	NM_001256295	1.8975	chr21	+	40177231	40196878
CS10T	ETS2	NM_005239	1.8975	chr21	+	40177755	40196878
CS10T	PSMG1	NM_003720	1.8975	chr21	-	40547384	40555440
CS10T	PSMG1	NM_203433	1.8975	chr21	-	40547384	40555440
CS10T	BRWD1	NM_018963	1.8975	chr21	-	40557404	40685712
CS10T	BRWD1	NM_033656	1.8975	chr21	-	40557404	40685712
CS10T	BRWD1	NM_001007246	1.8975	chr21	-	40668363	40685712
CS10T	BRWD1-IT2	NR_033800	1.8975	chr21	-	40685861	40686888
CS10T	HMGN1	NM_004965	1.8975	chr21	-	40714241	40721047
CS10T	WRB	NM_004627	1.8975	chr21	+	40752213	40769815
CS10T	WRB	NM_001146218	1.8975	chr21	+	40759692	40769815
CS10T	LCA5L	NM_152505	1.8975	chr21	-	40777770	40816128
CS10T	SH3BGR	NM_001001713	1.8975	chr21	+	40817797	40887433
CS10T	SH3BGR	NM_007341	1.8975	chr21	+	40823780	40887433
CS10T	C21orf88	NR_026542	1.8975	chr21	-	40969075	40984749
CS10T	C21orf88	NR_026543	1.8975	chr21	-	40977534	40984749
CS10T	B3GALT5	NM_006057	1.8975	chr21	+	41029254	41034815
CS10T	B3GALT5	NM_033170	1.8975	chr21	+	41029254	41034815
CS10T	B3GALT5	NM_033171	1.8975	chr21	+	41029254	41034815
CS10T	B3GALT5	NM_033172	1.8975	chr21	+	41029254	41034815
CS10T	B3GALT5	NM_033173	1.8975	chr21	+	41029254	41034815
CS10T	IGSF5	NM_001080444	1.8975	chr21	+	41117334	41174023
CS10T	PCP4	NM_006198	1.8975	chr21	+	41239347	41301322
CS10T	DSCAM	NM_001389	1.8975	chr21	-	41384343	42219039
CS10T	MIR4760	NR_039917	1.8975	chr21	-	41584279	41584358
CS10T	DSCAM-AS1	NR_038896	1.8975	chr21	+	41755010	41757285
CS10T	DSCAM-AS1	NR_038898	1.8975	chr21	+	41755010	41757285
CS10T	DSCAM-AS1	NR_038900	1.8975	chr21	+	41755010	41757285
CS10T	DSCAM-AS1	NR_038899	1.8975	chr21	+	41755011	41757285
CS10T	LINC00323	NR_024100	1.8975	chr21	-	42513427	42519991
CS10T	MIR3197	NR_036167	1.8975	chr21	+	42539484	42539556
CS10T	BACE2	NM_012105	1.8975	chr21	+	42539728	42648524
CS10T	BACE2	NM_138991	1.8975	chr21	+	42539728	42648524
CS10T	BACE2	NM_138992	1.8975	chr21	+	42539728	42648524
CS10T	PLAC4	NM_182832	1.8975	chr21	-	42547158	42557166
CS10T	FAM3B	NM_058186	1.8975	chr21	+	42688661	42729654
CS10T	FAM3B	NM_206964	1.8975	chr21	+	42688661	42729654
CS10T	MX2	NM_002463	1.8975	chr21	+	42733950	42780869
CS10T	MX1	NM_001144925	1.8975	chr21	+	42792520	42831141
CS10T	MX1	NM_002462	1.8975	chr21	+	42797978	42831141
CS10T	MX1	NM_001178046	1.8975	chr21	+	42798103	42831141
CS10T	TMPRSS2	NM_001135099	1.8975	chr21	-	42836478	42879992
CS10T	TMPRSS2	NM_005656	1.8975	chr21	-	42836478	42880085
CS10T	LINC00111	NR_024367	1.8975	chr21	+	43099462	43117496
CS10T	LINC00479	NR_027272	1.8975	chr21	-	43131680	43135935
CS10T	LINC00112	NR_024028	1.8975	chr21	+	43136596	43137742
CS10T	RIPK4	NM_020639	1.8975	chr21	-	43159529	43187249
CS10T	PRDM15	NM_001040424	1.8975	chr21	-	43218385	43299582
CS10T	PRDM15	NM_022115	1.8975	chr21	-	43221325	43299591
CS10T	C2CD2	NM_015500	1.8975	chr21	-	43305219	43373999
CS10T	C2CD2	NM_199050	1.8975	chr21	-	43305219	43346799
CS10T	ZNF295	NM_001098402	1.8975	chr21	-	43406940	43430496
CS10T	ZNF295	NM_001098403	1.8975	chr21	-	43406940	43430496
CS10T	ZNF295	NM_020727	1.8975	chr21	-	43406940	43430496
CS10T	ZNF295-AS1	NR_027273	1.8975	chr21	+	43442113	43445060
CS10T	UMODL1	NM_001199527	1.8975	chr21	+	43483068	43563105
CS10T	UMODL1	NM_001199528	1.8975	chr21	+	43483068	43563105
CS10T	UMODL1	NM_001004416	1.8975	chr21	+	43491426	43563105
CS10T	UMODL1	NM_173568	1.8975	chr21	+	43491426	43563105
CS10T	C21orf128	NR_027243	1.8975	chr21	-	43522244	43528644
CS10T	ABCG1	NM_207627	1.8975	chr21	+	43619799	43717354
CS10T	ABCG1	NM_207628	1.8975	chr21	+	43619922	43717354
CS10T	ABCG1	NM_207629	1.8975	chr21	+	43636187	43717354
CS10T	ABCG1	NM_004915	1.8975	chr21	+	43639267	43717354
CS10T	ABCG1	NM_016818	1.8975	chr21	+	43639267	43717354
CS10T	ABCG1	NM_207174	1.8975	chr21	+	43640008	43717354
CS10T	TFF3	NM_003226	1.8975	chr21	-	43731777	43735706
CS10T	TFF2	NM_005423	1.8975	chr21	-	43766467	43771208
CS10T	TFF1	NM_003225	1.8975	chr21	-	43782391	43786644
CS10T	TMPRSS3	NM_001256317	1.8975	chr21	-	43791996	43816200
CS10T	TMPRSS3	NM_024022	1.8975	chr21	-	43791996	43816200
CS10T	TMPRSS3	NM_032404	1.8975	chr21	-	43791996	43809258
CS10T	TMPRSS3	NR_046020	1.8975	chr21	-	43791996	43816955
CS10T	TMPRSS3	NM_032405	1.8975	chr21	-	43801985	43816200
CS10T	UBASH3A	NM_001001895	1.8975	chr21	+	43823971	43867790
CS10T	UBASH3A	NM_001243467	1.8975	chr21	+	43823971	43867790
CS10T	UBASH3A	NM_018961	1.8975	chr21	+	43823971	43867790
CS10T	RSPH1	NM_080860	1.8975	chr21	-	43892597	43916401
CS10T	SLC37A1	NM_018964	1.8975	chr21	+	43919742	44001550
CS10T	PDE9A	NM_001001567	1.8975	chr21	+	44073862	44195618
CS10T	PDE9A	NM_001001568	1.8975	chr21	+	44073862	44195618
CS10T	PDE9A	NM_001001569	1.8975	chr21	+	44073862	44195618
CS10T	PDE9A	NM_001001570	1.8975	chr21	+	44073862	44195618
CS10T	PDE9A	NM_001001571	1.8975	chr21	+	44073862	44195618
CS10T	PDE9A	NM_001001572	1.8975	chr21	+	44073862	44195618
CS10T	PDE9A	NM_001001573	1.8975	chr21	+	44073862	44195618
CS10T	PDE9A	NM_001001574	1.8975	chr21	+	44073862	44195618
CS10T	PDE9A	NM_001001575	1.8975	chr21	+	44073862	44195618
CS10T	PDE9A	NM_001001576	1.8975	chr21	+	44073862	44195618
CS10T	PDE9A	NM_001001577	1.8975	chr21	+	44073862	44195618
CS10T	PDE9A	NM_001001578	1.8975	chr21	+	44073862	44195618
CS10T	PDE9A	NM_001001579	1.8975	chr21	+	44073862	44195618
CS10T	PDE9A	NM_001001580	1.8975	chr21	+	44073862	44195618
CS10T	PDE9A	NM_001001581	1.8975	chr21	+	44073862	44195618
CS10T	PDE9A	NM_001001582	1.8975	chr21	+	44073862	44195618
CS10T	PDE9A	NM_001001583	1.8975	chr21	+	44073862	44195618
CS10T	PDE9A	NM_001001584	1.8975	chr21	+	44073862	44195618
CS10T	PDE9A	NM_001001585	1.8975	chr21	+	44073862	44195618
CS10T	PDE9A	NM_002606	1.8975	chr21	+	44073862	44195618
CS10T	WDR4	NM_033661	1.8975	chr21	-	44263204	44299678
CS10T	WDR4	NM_018669	1.8975	chr21	-	44269336	44299678
CS10T	NDUFV3	NM_001001503	1.8975	chr21	+	44313378	44329773
CS10T	NDUFV3	NM_021075	1.8975	chr21	+	44313378	44329773
CS10T	PKNOX1	NM_004571	1.8975	chr21	+	44394643	44453688
CS10T	CBS	NM_000071	1.8975	chr21	-	44473301	44496040
CS10T	CBS	NM_001178008	1.8975	chr21	-	44473301	44496472
CS10T	CBS	NM_001178009	1.8975	chr21	-	44473301	44496472
CS10T	U2AF1	NM_001025203	1.8975	chr21	-	44513066	44527688
CS10T	U2AF1	NM_001025204	1.8975	chr21	-	44513066	44527688
CS10T	U2AF1	NM_006758	1.8975	chr21	-	44513066	44527688
CS10T	CRYAA	NM_000394	1.8975	chr21	+	44589141	44592913
CS10T	SIK1	NM_173354	1.8975	chr21	-	44834398	44847002
CS10T	LINC00319	NR_026960	1.8975	chr21	+	44869904	44873771
CS10T	LINC00313	NR_026863	1.8975	chr21	-	44881974	44898103
CS10T	HSF2BP	NM_007031	1.8975	chr21	-	44949072	45079374
CS10T	RRP1B	NM_015056	1.8975	chr21	+	45079432	45115960
CS10T	PDXK	NM_003681	1.8975	chr21	+	45138978	45182188
CS10T	CSTB	NM_000100	1.8975	chr21	-	45193546	45196256
CS10T	RRP1	NM_003683	1.8975	chr21	+	45209418	45223983
CS10T	LOC284837	NR_026961	1.8975	chr21	-	45225639	45232448
CS10T	AGPAT3	NM_020132	1.8975	chr21	+	45285116	45407475
CS10T	AGPAT3	NM_001037553	1.8975	chr21	+	45345279	45407475
CS10T	TRAPPC10	NM_003274	1.8975	chr21	+	45432206	45526432
CS10T	PWP2	NM_005049	1.8975	chr21	+	45527208	45551063
CS10T	C21orf33	NM_004649	1.8975	chr21	+	45553494	45565605
CS10T	C21orf33	NM_198155	1.8975	chr21	+	45553494	45565605
CS10T	ICOSLG	NM_015259	1.8975	chr21	-	45646722	45660834
CS10T	DNMT3L	NM_013369	1.8975	chr21	-	45666223	45682099
CS10T	DNMT3L	NM_175867	1.8975	chr21	-	45666223	45682099
CS10T	AIRE	NM_000383	1.8975	chr21	+	45705763	45718102
CS10T	AIRE	NM_000658	1.8975	chr21	+	45710274	45718110
CS10T	PFKL	NR_024108	1.8975	chr21	+	45719925	45747261
CS10T	PFKL	NM_002626	1.8975	chr21	+	45719930	45747256
CS10T	C21orf2	NM_004928	1.8975	chr21	-	45748827	45759285
CS10T	TRPM2	NM_003307	1.8975	chr21	+	45773484	45862964
CS10T	TRPM2	NR_038257	1.8975	chr21	+	45773484	45862964
CS10T	LRRC3	NM_030891	1.8975	chr21	+	45875393	45878739
CS10T	TSPEAR	NM_144991	1.8975	chr21	-	45917775	46131495
CS10T	C21orf90	NR_026547	1.8975	chr21	+	45937098	45938860
CS10T	C21orf90	NR_026548	1.8975	chr21	+	45937098	45938860
CS10T	KRTAP10-1	NM_198691	1.8975	chr21	-	45959068	45960078
CS10T	KRTAP10-2	NM_198693	1.8975	chr21	-	45970318	45971388
CS10T	KRTAP10-3	NM_198696	1.8975	chr21	-	45977906	45978643
CS10T	KRTAP10-4	NM_198687	1.8975	chr21	+	45993606	45994987
CS10T	KRTAP10-5	NM_198694	1.8975	chr21	-	45999564	46000481
CS10T	KRTAP10-6	NM_198688	1.8975	chr21	-	46011149	46012386
CS10T	KRTAP10-7	NM_198689	1.8975	chr21	+	46020497	46022091
CS10T	KRTAP10-8	NM_198695	1.8975	chr21	+	46031996	46032871
CS10T	KRTAP10-9	NM_198690	1.8975	chr21	+	46047040	46048295
CS10T	KRTAP10-10	NM_181688	1.8975	chr21	+	46057273	46058372
CS10T	KRTAP10-11	NM_198692	1.8975	chr21	+	46066331	46067566
CS10T	KRTAP12-4	NM_198698	1.8975	chr21	-	46074130	46074576
CS10T	KRTAP12-3	NM_198697	1.8975	chr21	+	46077849	46078258
CS10T	KRTAP12-2	NM_181684	1.8975	chr21	-	46086106	46086844
CS10T	KRTAP12-1	NM_181686	1.8975	chr21	-	46101491	46102078
CS10T	KRTAP10-12	NM_198699	1.8975	chr21	+	46117087	46117959
CS10T	UBE2G2	NM_001202489	1.8975	chr21	-	46188495	46221751
CS10T	UBE2G2	NM_003343	1.8975	chr21	-	46188495	46221751
CS10T	UBE2G2	NM_182688	1.8975	chr21	-	46188495	46221751
CS10T	SUMO3	NM_006936	1.8975	chr21	-	46225532	46238044
CS10T	PTTG1IP	NM_004339	1.8975	chr21	-	46269500	46293818
CS10T	ITGB2	NM_000211	1.8975	chr21	-	46305868	46340965
CS10T	ITGB2	NM_001127491	1.8975	chr21	-	46305868	46348753
CS10T	LOC100505746	NR_038311	1.8975	chr21	+	46340950	46349595
CS10T	LOC100505746	NR_038312	1.8975	chr21	+	46340950	46349595
CS10T	LOC100505746	NR_038313	1.8975	chr21	+	46340950	46349595
CS10T	LOC100505746	NR_038314	1.8975	chr21	+	46340950	46349595
CS10T	LOC100505746	NR_038315	1.8975	chr21	+	46340950	46349595
CS10T	LOC100505746	NR_038316	1.8975	chr21	+	46340950	46349595
CS10T	C21orf67	NR_027128	1.8975	chr21	-	46353199	46359828
CS10T	C21orf67	NR_027129	1.8975	chr21	-	46354641	46359828
CS10T	FAM207A	NM_058190	1.8975	chr21	+	46359955	46396888
CS10T	LINC00163	NR_033840	1.8975	chr21	-	46409779	46414001
CS10T	LINC00162	NR_024089	1.8975	chr21	-	46419127	46424642
CS10T	SSR4P1	NR_027292	1.8975	chr21	-	46490871	46493126
CS10T	ADARB1	NM_001112	1.8975	chr21	+	46494493	46646478
CS10T	ADARB1	NM_001160230	1.8975	chr21	+	46494493	46646478
CS10T	ADARB1	NM_015833	1.8975	chr21	+	46494493	46646478
CS10T	ADARB1	NM_015834	1.8975	chr21	+	46494493	46646478
CS10T	ADARB1	NR_027672	1.8975	chr21	+	46494493	46646478
CS10T	ADARB1	NR_027673	1.8975	chr21	+	46494493	46646478
CS10T	ADARB1	NR_027674	1.8975	chr21	+	46494493	46646478
CS10T	POFUT2	NM_015227	1.8975	chr21	-	46683843	46707811
CS10T	POFUT2	NM_133635	1.8975	chr21	-	46683843	46707811
CS10T	POFUT2	NR_004858	1.8975	chr21	-	46683843	46707811
CS10T	LOC642852	NR_026943	1.8975	chr21	+	46707967	46717269
CS10T	LINC00315	NR_046319	1.8975	chr21	-	46720160	46725172
CS10T	COL18A1	NM_130445	1.8975	chr21	+	46825097	46933634
CS10T	COL18A1-AS1	NR_027498	1.8975	chr21	-	46839631	46844985
CS10T	COL18A1-AS1	NR_028082	1.8975	chr21	-	46839631	46844955
CS10T	COL18A1	NM_030582	1.8975	chr21	+	46875424	46933634
CS10T	SLC19A1	NM_001205206	1.8975	chr21	-	46934629	46962385
CS10T	SLC19A1	NM_001205207	1.8975	chr21	-	46934629	46954542
CS10T	SLC19A1	NM_194255	1.8975	chr21	-	46934629	46962385
CS10T	LOC100129027	NR_038876	1.8975	chr21	-	47247755	47256333
CS10T	PCBP3	NM_001130141	1.8975	chr21	+	47269875	47362368
CS10T	PCBP3	NM_020528	1.8975	chr21	+	47269875	47362368
CS10T	COL6A1	NM_001848	1.8975	chr21	+	47401663	47424963
CS10T	COL6A2	NM_001849	1.8975	chr21	+	47518033	47552763
CS10T	COL6A2	NM_058174	1.8975	chr21	+	47518033	47549719
CS10T	COL6A2	NM_058175	1.8975	chr21	+	47518033	47549719
CS10T	FTCD	NM_006657	1.8975	chr21	-	47556176	47575481
CS10T	FTCD	NM_206965	1.8975	chr21	-	47556694	47575481
CS10T	C21orf56	NM_001142854	1.8975	chr21	-	47581062	47604373
CS10T	C21orf56	NM_032261	1.8975	chr21	-	47581062	47604373
CS10T	LSS	NM_001001438	1.8975	chr21	-	47608360	47648738
CS10T	LSS	NM_001145436	1.8975	chr21	-	47609038	47648738
CS10T	LSS	NM_001145437	1.8975	chr21	-	47609038	47648738
CS10T	LSS	NM_002340	1.8975	chr21	-	47609038	47648738
CS10T	MCM3AP-AS1	NR_002776	1.8975	chr21	+	47649158	47671604
CS10T	MCM3AP	NM_003906	1.8975	chr21	-	47655048	47705236
CS10T	YBEY	NM_001006114	1.8975	chr21	+	47706267	47712111
CS10T	YBEY	NM_058181	1.8975	chr21	+	47706267	47717665
CS10T	C21orf58	NM_058180	1.8975	chr21	-	47721047	47743785
CS10T	PCNT	NM_006031	1.8975	chr21	+	47744036	47865682
CS10T	DIP2A	NM_001146114	1.8975	chr21	+	47878862	47976432
CS10T	DIP2A	NM_001146115	1.8975	chr21	+	47878862	47967120
CS10T	DIP2A	NM_001146116	1.8975	chr21	+	47878862	47989926
CS10T	DIP2A	NM_015151	1.8975	chr21	+	47878862	47989926
CS10T	DIP2A	NM_206889	1.8975	chr21	+	47878862	47970023
CS10T	DIP2A	NM_206890	1.8975	chr21	+	47878862	47967120
CS10T	DIP2A	NM_206891	1.8975	chr21	+	47878862	47966219
CS10T	DIP2A-IT1	NR_046400	1.8975	chr21	+	47882384	47889218
CS10T	S100B	NM_006272	1.8975	chr21	-	48018531	48025035
CS10T	PRMT2	NM_001242864	1.8975	chr21	+	48055507	48085155
CS10T	PRMT2	NM_001242865	1.8975	chr21	+	48055507	48075276
CS10T	PRMT2	NM_001242866	1.8975	chr21	+	48055507	48080068
CS10T	PRMT2	NM_001535	1.8975	chr21	+	48055507	48085155
CS10T	PRMT2	NM_206962	1.8975	chr21	+	48055507	48085155
CS10T	LOC100287205	NM_001256853	1.5904	chr4	+	9221878	9223470
CS10T	LOC100287478	NM_001256862	1.5904	chr4	+	9221878	9223470
CS10T	LOC100287238	NM_001256855	1.5904	chr4	+	9226622	9228214
CS10T	LOC100288520	NM_001256894	1.5904	chr4	+	9236111	9238060
CS10T	LOC100287327	NM_001256857	1.5904	chr4	+	9245605	9247197
CS10T	LOC100287178	NM_001256854	1.5904	chr4	+	9250356	9251948
CS10T	LOC100287364	NM_001256859	1.5904	chr4	+	9250356	9251948
CS10T	LOC100287404	NM_001256860	1.5904	chr4	+	9255104	9256696
CS10T	LOC100287178	NM_001256854	1.5904	chr4	+	9259850	9261442
CS10T	LOC100287441	NM_001256861	1.5904	chr4	+	9259850	9261442
CS10T	LOC100287513	NM_001256863	1.5904	chr4	+	9259850	9261442
CS10T	LOC100287205	NM_001256853	1.5904	chr4	+	9264598	9266190
CS10T	LOC100287478	NM_001256862	1.5904	chr4	+	9264598	9266190
CS10T	LOC100287441	NM_001256861	1.5904	chr4	+	9269345	9270937
CS10T	LOC100287513	NM_001256863	1.5904	chr4	+	9269345	9270937
CS10T	LOC728369	NM_001242327	1.5904	chr4	+	9326891	9328483
CS10T	LOC728373	NM_001242326	1.5904	chr4	+	9326891	9328483
CS10T	LOC728379	NM_001242328	1.5904	chr4	+	9326891	9328483
CS10T	LOC728393	NM_001242330	1.5904	chr4	+	9326891	9328483
CS10T	LOC728400	NM_001242331	1.5904	chr4	+	9326891	9328483
CS10T	LOC728405	NM_001242332	1.5904	chr4	+	9326891	9328483
CS10T	LOC728419	NM_001256867	1.5904	chr4	+	9326891	9328483
CS10T	USP17L5	NM_001242329	1.5904	chr4	+	9326891	9328483
CS10T	LOC728369	NM_001242327	1.5904	chr4	+	9331637	9333229
CS10T	LOC728373	NM_001242326	1.5904	chr4	+	9331637	9333229
CS10T	LOC728379	NM_001242328	1.5904	chr4	+	9331637	9333229
CS10T	LOC728393	NM_001242330	1.5904	chr4	+	9331637	9333229
CS10T	LOC728400	NM_001242331	1.5904	chr4	+	9331637	9333229
CS10T	LOC728405	NM_001242332	1.5904	chr4	+	9331637	9333229
CS10T	LOC728419	NM_001256867	1.5904	chr4	+	9331637	9333229
CS10T	USP17L5	NM_001242329	1.5904	chr4	+	9331637	9333229
CS10T	LOC728369	NM_001242327	1.5904	chr4	+	9336384	9337976
CS10T	LOC728373	NM_001242326	1.5904	chr4	+	9336384	9337976
CS10T	LOC728379	NM_001242328	1.5904	chr4	+	9336384	9337976
CS10T	LOC728393	NM_001242330	1.5904	chr4	+	9336384	9337976
CS10T	LOC728400	NM_001242331	1.5904	chr4	+	9336384	9337976
CS10T	LOC728405	NM_001242332	1.5904	chr4	+	9336384	9337976
CS10T	LOC728419	NM_001256867	1.5904	chr4	+	9336384	9337976
CS10T	USP17L5	NM_001242329	1.5904	chr4	+	9336384	9337976
CS10T	LOC728369	NM_001242327	1.5904	chr4	+	9341129	9342721
CS10T	LOC728373	NM_001242326	1.5904	chr4	+	9341129	9342721
CS10T	LOC728379	NM_001242328	1.5904	chr4	+	9341129	9342721
CS10T	LOC728393	NM_001242330	1.5904	chr4	+	9341129	9342721
CS10T	LOC728400	NM_001242331	1.5904	chr4	+	9341129	9342721
CS10T	LOC728405	NM_001242332	1.5904	chr4	+	9341129	9342721
CS10T	LOC728419	NM_001256867	1.5904	chr4	+	9341129	9342721
CS10T	USP17L5	NM_001242329	1.5904	chr4	+	9341129	9342721
CS10T	LOC728369	NM_001242327	1.5904	chr4	+	9345874	9347466
CS10T	LOC728373	NM_001242326	1.5904	chr4	+	9345874	9347466
CS10T	LOC728379	NM_001242328	1.5904	chr4	+	9345874	9347466
CS10T	LOC728393	NM_001242330	1.5904	chr4	+	9345874	9347466
CS10T	LOC728400	NM_001242331	1.5904	chr4	+	9345874	9347466
CS10T	LOC728405	NM_001242332	1.5904	chr4	+	9345874	9347466
CS10T	LOC728419	NM_001256867	1.5904	chr4	+	9345874	9347466
CS10T	USP17L5	NM_001242329	1.5904	chr4	+	9345874	9347466
CS10T	LOC728369	NM_001242327	1.5904	chr4	+	9350619	9352211
CS10T	LOC728373	NM_001242326	1.5904	chr4	+	9350619	9352211
CS10T	LOC728379	NM_001242328	1.5904	chr4	+	9350619	9352211
CS10T	LOC728393	NM_001242330	1.5904	chr4	+	9350619	9352211
CS10T	LOC728400	NM_001242331	1.5904	chr4	+	9350619	9352211
CS10T	LOC728405	NM_001242332	1.5904	chr4	+	9350619	9352211
CS10T	LOC728419	NM_001256867	1.5904	chr4	+	9350619	9352211
CS10T	USP17L5	NM_001242329	1.5904	chr4	+	9350619	9352211
CS10T	LOC728369	NM_001242327	1.5904	chr4	+	9355364	9356956
CS10T	LOC728373	NM_001242326	1.5904	chr4	+	9355364	9356956
CS10T	LOC728379	NM_001242328	1.5904	chr4	+	9355364	9356956
CS10T	LOC728393	NM_001242330	1.5904	chr4	+	9355364	9356956
CS10T	LOC728400	NM_001242331	1.5904	chr4	+	9355364	9356956
CS10T	LOC728405	NM_001242332	1.5904	chr4	+	9355364	9356956
CS10T	LOC728419	NM_001256867	1.5904	chr4	+	9355364	9356956
CS10T	USP17L5	NM_001242329	1.5904	chr4	+	9355364	9356956
CS10T	USP17	NR_046416	1.5904	chr4	+	9360108	9361700
CS10T	LOC728369	NM_001242327	1.5904	chr4	+	9364855	9366447
CS10T	LOC728373	NM_001242326	1.5904	chr4	+	9364855	9366447
CS10T	LOC728379	NM_001242328	1.5904	chr4	+	9364855	9366447
CS10T	LOC728393	NM_001242330	1.5904	chr4	+	9364855	9366447
CS10T	LOC728400	NM_001242331	1.5904	chr4	+	9364855	9366447
CS10T	LOC728405	NM_001242332	1.5904	chr4	+	9364855	9366447
CS10T	LOC728419	NM_001256867	1.5904	chr4	+	9364855	9366447
CS10T	USP17L5	NM_001242329	1.5904	chr4	+	9364855	9366447
CS10T	USP17L6P	NR_027279	1.5904	chr4	+	9369600	9370796
CS10T	CDY1B	NM_001003895	1.6979	chrY	-	26191377	26194161
CS10T	CDY1	NM_004680	1.6979	chrY	-	26191377	26194161
CS10T	CDY1B	NM_001003894	1.6979	chrY	-	26191940	26194161
CS10T	CDY1	NM_170723	1.6979	chrY	-	26191940	26194161
CS10T	CSPG4P1Y	NR_001554	1.6979	chrY	-	26329581	26333378
CS10T	GOLGA2P2Y	NR_001555	1.6979	chrY	-	26356114	26360978
CS10T	GOLGA2P3Y	NR_002195	1.6979	chrY	-	26356114	26360978
CS10T	TTTY17A	NR_001526	1.6979	chrY	+	26631479	26632610
CS10T	TTTY17B	NR_002180	1.6979	chrY	+	26631479	26632610
CS10T	TTTY17C	NR_002179	1.6979	chrY	+	26631479	26632610
CS10T	TTTY4B	NR_002178	1.6979	chrY	+	26716349	26753172
CS10T	TTTY4C	NR_002177	1.6979	chrY	+	26716349	26753172
CS10T	TTTY4	NR_001525	1.6979	chrY	+	26716349	26753172
CS10T	BPY2B	NM_001002760	1.6979	chrY	+	26764151	26785352
CS10T	BPY2C	NM_001002761	1.6979	chrY	+	26764151	26785352
CS10T	BPY2	NM_004678	1.6979	chrY	+	26764151	26785352
CS10T	DAZ3	NM_020364	1.6979	chrY	-	26909216	26959639
CS10T	DAZ4	NM_020420	1.6979	chrY	-	26909216	26959639
CS10T	DAZ3	NM_020364	1.6979	chrY	+	26979967	27053187
CS10T	DAZ4	NM_001005375	1.6979	chrY	+	26979967	27053187
CS10T	DAZ4	NM_020420	1.6979	chrY	+	26979967	27053187
CS10T	DAZ2	NM_001005785	1.6979	chrY	+	26979990	27053187
CS10T	DAZ2	NM_001005786	1.6979	chrY	+	26979990	27053187
CS10T	BPY2B	NM_001002760	1.6979	chrY	-	27177050	27198251
CS10T	BPY2C	NM_001002761	1.6979	chrY	-	27177050	27198251
CS10T	BPY2	NM_004678	1.6979	chrY	-	27177050	27198251
CS10T	TTTY4B	NR_002178	1.6979	chrY	-	27209230	27246039
CS10T	TTTY4C	NR_002177	1.6979	chrY	-	27209230	27246039
CS10T	TTTY4	NR_001525	1.6979	chrY	-	27209230	27246039
CS10T	TTTY17A	NR_001526	1.6979	chrY	-	27329790	27330920
CS10T	TTTY17B	NR_002180	1.6979	chrY	-	27329790	27330920
CS10T	TTTY17C	NR_002179	1.6979	chrY	-	27329790	27330920
CS10T	GOLGA2P2Y	NR_001555	1.6979	chrY	+	27601458	27606322
CS10T	GOLGA2P3Y	NR_002195	1.6979	chrY	+	27601458	27606322
CS10T	CSPG4P1Y	NR_001554	1.6979	chrY	+	27629055	27632852
CS10T	CDY1B	NM_001003894	1.6979	chrY	+	27768264	27770485
CS10T	CDY1B	NM_001003895	1.6979	chrY	+	27768264	27771048
CS10T	CDY1	NM_004680	1.6979	chrY	+	27768264	27771048
CS10T	CDY1	NM_170723	1.6979	chrY	+	27768264	27770485
CS10T	TTTY3B	NR_002176	1.6979	chrY	+	27874637	27879535
CS10T	TTTY3	NR_001524	1.6979	chrY	+	27874637	27879535
