# Supplementary material for: Unique mutation portraits and frequent COL2A1 gene alteration in chondrosarcoma
Source: HighWire-hosted journal article supplement (doi:10.1101/gr.160598.113), 2014-07-14
Supplement: Supp_Table_S7.xlsx [file Supp_Table_S7.xlsx]

## Sheet: Sheet1
Gene	Missense	Rearrangement	Total	Observed #sample	CDS Length	Gene Length	Expected #sample	P-value	q-value
TP53	1	1	2	2	927	19144	0.0265	0.0003	0.0023
IDH1	2	0	2	2	1245	18854	0.0317	0.0005	0.0023
ACVR2A	1	1	2	2	1542	85824	0.0498	0.0012	0.0024
COL2A1	1	3	4	2	4360	31538	0.1075	0.0054	0.0091
YEATS2	1	1	2	2	4269	114808	0.1146	0.0061	0.0091
