# Supplementary material for: Unique mutation portraits and frequent COL2A1 gene alteration in chondrosarcoma
Source: HighWire-hosted journal article supplement (doi:10.1101/gr.160598.113), 2014-07-14
Supplement: Supp_Table_S8.xlsx [file Supp_Table_S8.xlsx]

## Sheet: Sheet1
Age	Gender	Sample name	Diagnosis	IDH1	IDH2	ACVR2A	COL2A1	YEATS2	Peripheral/central	Grade	Precursor/hereditary	Location	Tumor size (cm)	Metastatis	Metastasis free surviva (month)l	Overall Survival (month)	Outcome
48	M	CS2v	CS	1	0	0	0	0	central	2		ext	3	0	183	183	NED
22	M	CS3v	CS	0	0	0	0	0	central	2		axial	NA	0	77	77	DOD
27	F	CS4v	CS	0	0	0	1	0	periosteal	1		axial	6	0	43	43	CDF
74	F	CS5v	CS	0	0	0	0	0	central	2		ext	14	0	38	38	CDF
64	M	CS6v	CS	0	0	0	0	0	central	2		ext	10	1	26	63	DOD
19	F	CS7v	CS	0	0	0	0	0	peripheral	1	OC (Osteochondromatosis)	axial	9	0	136	136	CDF
81	F	CS9v	CS	0	0	0	0	0	central	3		ext	20	1	0	4	DOD
50	M	CS10v	CS	0	0	0	0	0	central	2		ext	13	1	19	20	DOD
54	F	CS11v	CS	0	0	0	0	0	central	1		axial	5	0	111	111	CDF
34	M	CS12v	CS	1	0	0	0	0	central	1		axial	9	0	119	119	CDF
51	M	CS13v	CS	0	0	0	0	0	central	2		ext	16	1	119	125	NED
42	F	CS14v	CS	1	0	0	0	0	periosteal	1		axial	12	0	116	116	CDF
51	F	CS15v	CS	0	0	0	0	0	central	2		ext	NA	0	261	261	CDF
32	M	CS16v	CS	0	0	0	0	0	peripheral	1		axial	15	0	115	115	CDF
61	M	CS17v	CS	0	0	0	0	0	central	2		ext	23	1	14	36	AWD
55	M	CS18v	CS	0	0	0	0	1	central	2		ext	9	0	111	111	CDF
31	M	CS19v	CS	0	0	0	0	0	central	2		axial	8	1	41	113	NED
78	F	CS20v	CS	0	0	0	0	0	central	1		axial	1.5	0	7	7	DOD
46	M	CS21v	CS	1	0	0	0	0	central	1		axial	2.8	0	95	95	CDF
39	M	CS22v	CS	0	0	0	0	0	central	2		axial	7.5	0	96	96	CDF
45	F	CS23v	CS	0	0	0	0	0	central	1		ext	7	0	98	98	CDF
50	F	CS24v	CS	0	0	0	1	0	central	2		axial	4	0	100	100	CDF
29	F	CS25v	CS	0	0	0	0	0	central	2		ext	9	0	97	97	CDF
60	F	CS26v	CS	0	0	1	1	1	central	1		axial	2.5	0	89	89	CDF
54	M	CS27v	CS	0	0	0	1	1	central	2		axial	8	0	78	78	NED
35	M	CS28v	CS	0	0	0	0	0	central	2		ext	6	0	75	75	CDF
60	F	CS29v	CS	0	0	0	0	0	central	2		ext	7	0	66	66	CDF
30	M	CS30v	CS	1	0	1	1	0	central	2	Ollier	ext	9	0	59	59	NED
61	M	CS31v	CS	0	0	0	0	0	central	1		axial	3	0	73	73	CDF
70	F	CS32v	CS	1	0	0	0	0	central	2		axial	10	0	13	13	DOD
69	M	CS33v	CS	0	0	0	0	0	central	3		axial	10	0	67	67	CDF
4	M	CS34v	CS	0	0	0	0	0	central	1	Ollier	ext	10	0	65	65	CDF
93	F	CS35v	CS	1	0	0	0	0	central	2		ext	NA	0	4	4	CDF
78	F	CS36v	CS	0	0	0	0	0	central	1		axial	11	1	0	1	AWD
36	M	CS37v	CS	1	0	0	0	0	central	1		axial	12	0	44	44	CDF
40	M	CS38v	CS	1	0	0	0	0	peripheral	1	OC	axial	10	0	42	42	CDF
70	M	CS39v	CS	0	0	0	1	1	central	2		ext	10	0	37	37	CDF
71	F	CS40v	CS	0	0	0	0	0	central	1		ext	10.5	0	35	35	CDF
62	M	CS41v	CS	0	0	0	0	0	central	2		ext	3.7	0	35	35	CDF
66	F	CS42v	CS	0	0	0	1	0	central	2		axial	7.4	0	12	12	DOD
52	M	CS43v	CS	0	0	0	0	0	periosteal	2		axial	17.5	0	33	33	AWD
27	F	CS44v	CS	0	0	0	0	0	central	2		axial	2.7	0	24	24	NED
59	M	CS45v	CS	0	0	0	0	0	central	2		axial	20	0	17	17	CDF
36	F	CS46v	CS	1	0	0	1	0	peripheral	2	OC	ext	5	0	17	17	CDF
76	F	CS47v	CS	0	0	0	0	0	central	2		ext	16	0	8	8	CDF
66	F	CS48v	CS	0	0	0	1	1	central	2		ext	26	0	11	11	CDF
57	M	CS49v	CS	0	0	0	0	0	central	1		axial	NA	NA	NA	NA	NA
57	F	EN1	EN	0	0	0	0	0				other	46	0
36	M	EN2	EN	0	0	0	0	0				acral	16	0
55	M	EN3	EN	0	0	0	0	0			Ollier	acral	80	0
40	F	EN4	EN	0	0	0	0	0				acral	21.3	0
34	M	EN5	EN	0	0	0	0	0				acral	19.6	0
51	F	EN6	EN	0	0	0	1	0				other	25.8	0
10	F	EN7	EN	1	0	0	1	0			Ollier	acral	15.8, 28.2	0
19	F	EN8	EN	0	0	0	1	0				acral	23.7	0
56	F	EN9	EN	0	0	0	0	0				other	41.5	0
30	F	EN10	EN	0	0	0	0	0				acral	11.3	0
26	M	EN11	EN	0	0	0	0	0				other	15.5	0
28	F	EN12	EN	1	0	0	1	0				acral	11.3	0
13	M	EN13	EN	0	0	0	0	0				acral	14.2	0
47	F	EN14	EN	0	0	0	0	0				other	55.2	0
45	F	EN15	EN	0	0	0	0	0				acral	10	0
34	M	EN16	EN	0	0	0	0	0				acral	20	0
54	F	EN17	EN	0	0	0	0	0				acral	20	0
75	M	EN18	EN	1	0	1	1	0	NA			acral	17	0
64	M	EN19	EN	0	0	1	0	0	NA			acral	25	0
31	F	EN20	EN	1	0	0	1	0	NA			acral	20	0
48	F	EN22	EN	0	0	0	0	0	NA			acral	20	0
59	F	EN23	EN	0	0	0	0	1	NA			acral	20	0
66	M	EN24	EN	0	0	0	1	0	NA			other	40	NA
56	F	EN25	EN	0	0	0	1	0	NA			acral	15	0
49	F	EN26	EN	0	0	0	0	0	NA			acral	10	0
35	M	EN27	EN	0	0	0	0	0	NA			acral	10	0
40	M	EN28	EN	0	0	0	1	0	NA			other	25	0
31	M	EN29	EN	0	0	0	1	0				acral	20	0
40	M	EN30	EN	0	0	0	0	0	NA			acral	10	0
24	F	EN31	EN	0	0	0	0	0	NA			acral	40	0
43	F	EN32	EN	0	0	1	0	0				acral	10	0
17	M	EN33	EN	0	0	0	0	0				acral	20	0
16	F	EN34	EN	0	0	0	0	0				acral	10	0
50	M	EN35	EN	0	0	0	0	0				acral	20	0
19	M	EN36	EN	0	0	0	1	0				other	50	NA
40	F	EN37	EN	0	1	0	0	0				acral	10	0
17	F	EN38	EN	0	0	0	0	0				acral	10	0
42	F	EN39	EN	0	0	0	1	0				acral	20	0
30	M	EN40	EN	0	0	0	1	0				acral	20	0
40	F	EN41	EN	1	0	0	0	0				other	20	0
49	F	EN42	EN	0	0	0	0	0			Ollier	acral	30	0
