# Supplementary material for: Unique mutation portraits and frequent COL2A1 gene alteration in chondrosarcoma
Source: HighWire-hosted journal article supplement (doi:10.1101/gr.160598.113), 2014-07-14
Supplement: Supp_Table_S10.xlsx [file Supp_Table_S10.xlsx]

## Sheet: Sheet1
gene	chondrosarcoma expression data by NCBI	CS01T (RPKM)	CS06T (RPKM)	CS07T (RPKM)
COL2A1	expressed	16651.3	4131.47	10.34
ACVR2A	expressed	3.68	150.1	5.82
YEATS2	expressed	9.79	7.44	17.62
