# Supplementary figures and images for: Unique mutation portraits and frequent COL2A1 gene alteration in chondrosarcoma
Source: HighWire-hosted journal article supplement (doi:10.1101/gr.160598.113), 2014-07-14

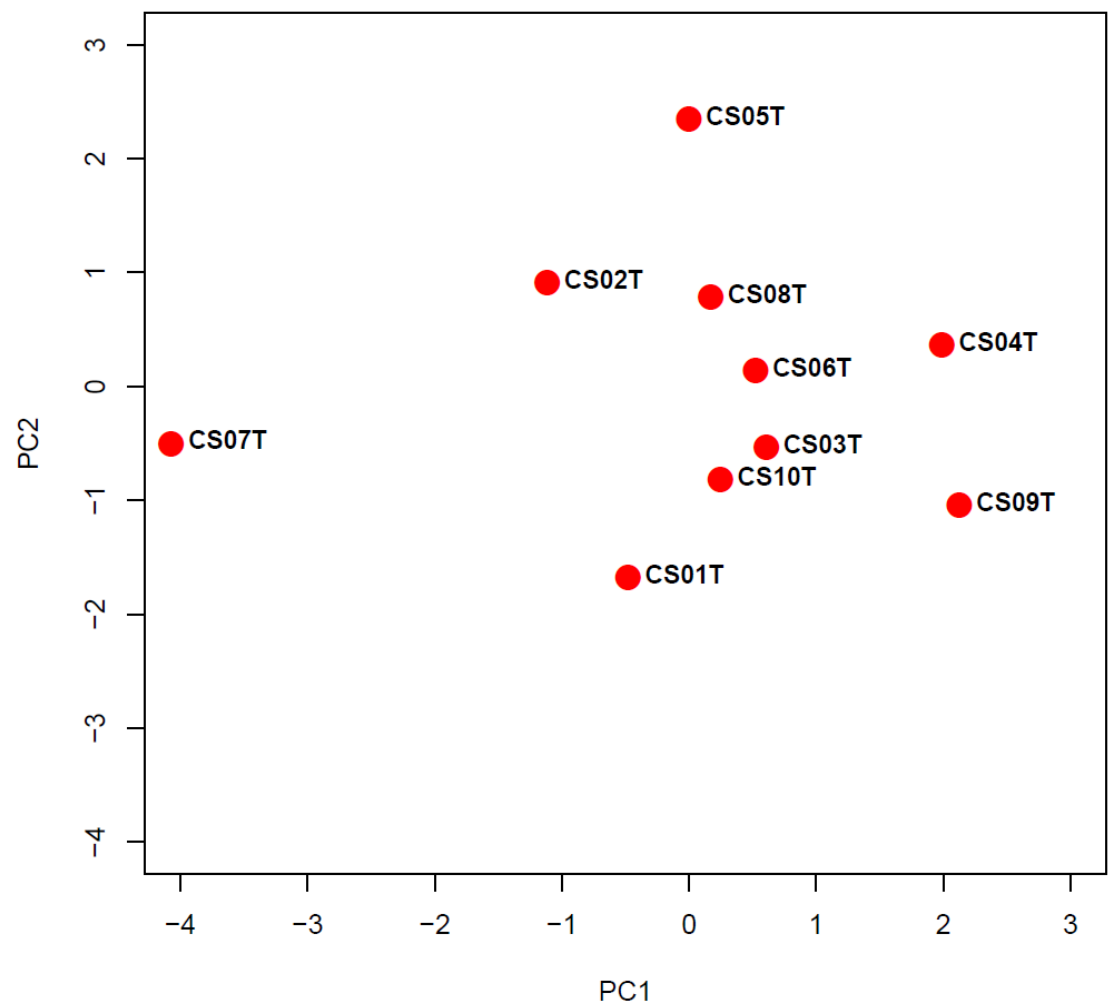

### Permutation test

| Subset               | Case                 | P-value |
|----------------------|----------------------|---------|
| Central type         | CS2T, 5T, 7T, 8T, 9T | 0.89    |
| <i>IDH1</i> mutation | CS2T, 8T             | 0.13    |

Supplement: Supp_Figure_S1.pdf [file Supp_Figure_S1.pdf]

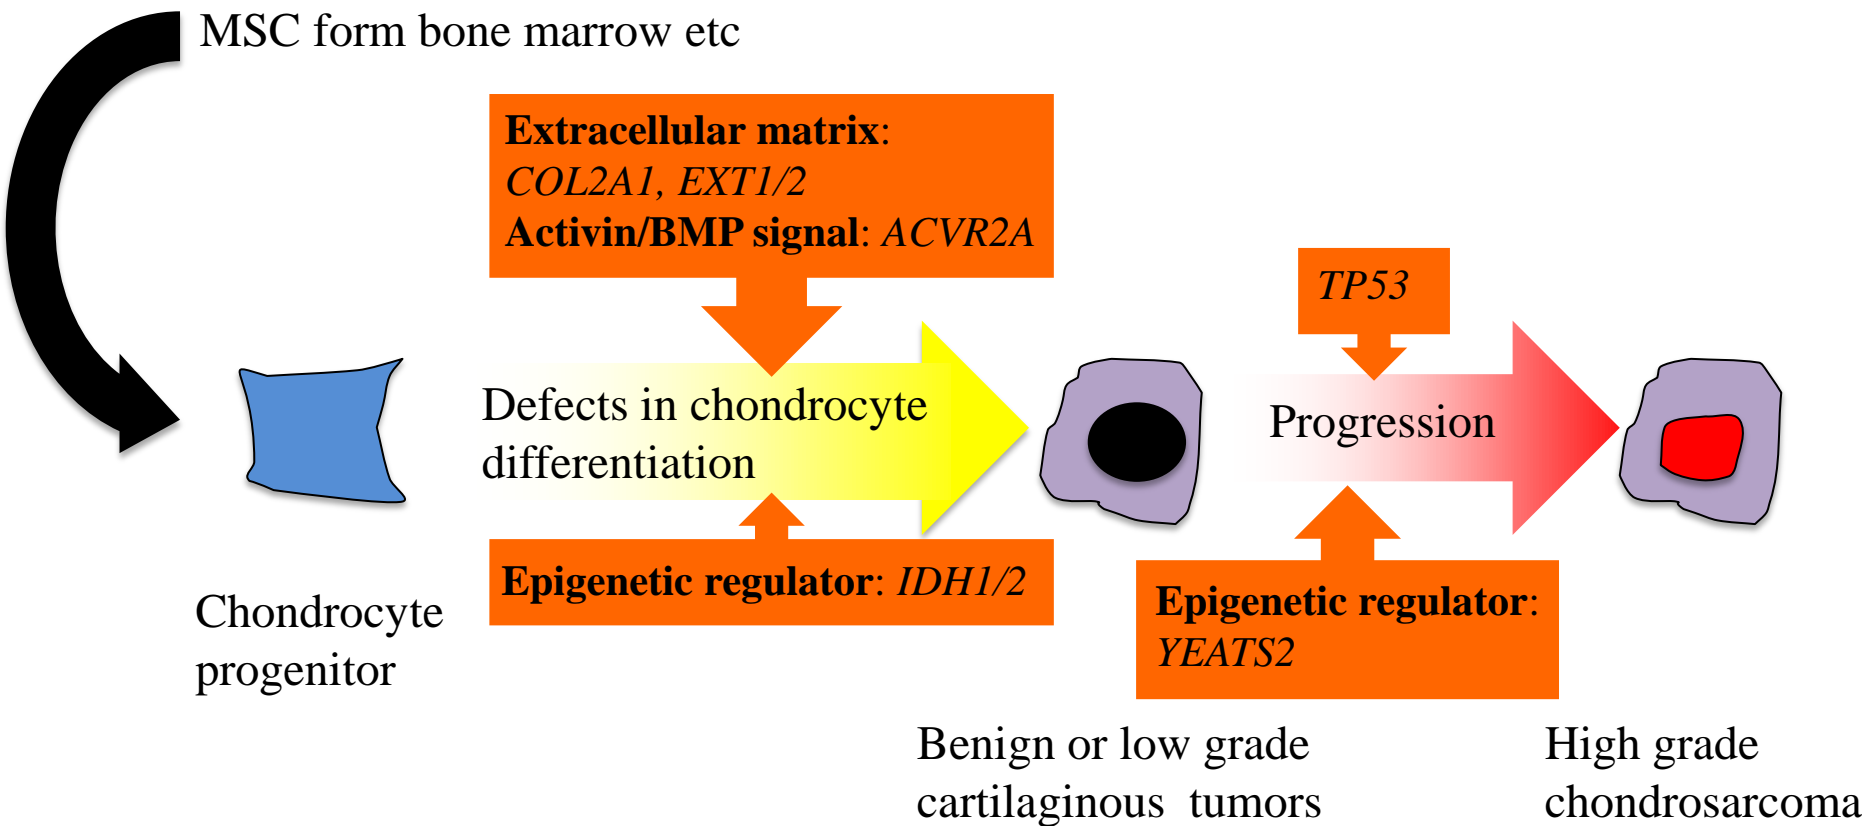

Supplementary Figure S14

Supplement: Supp_Figure_S14.pdf [file Supp_Figure_S14.pdf]

(A)

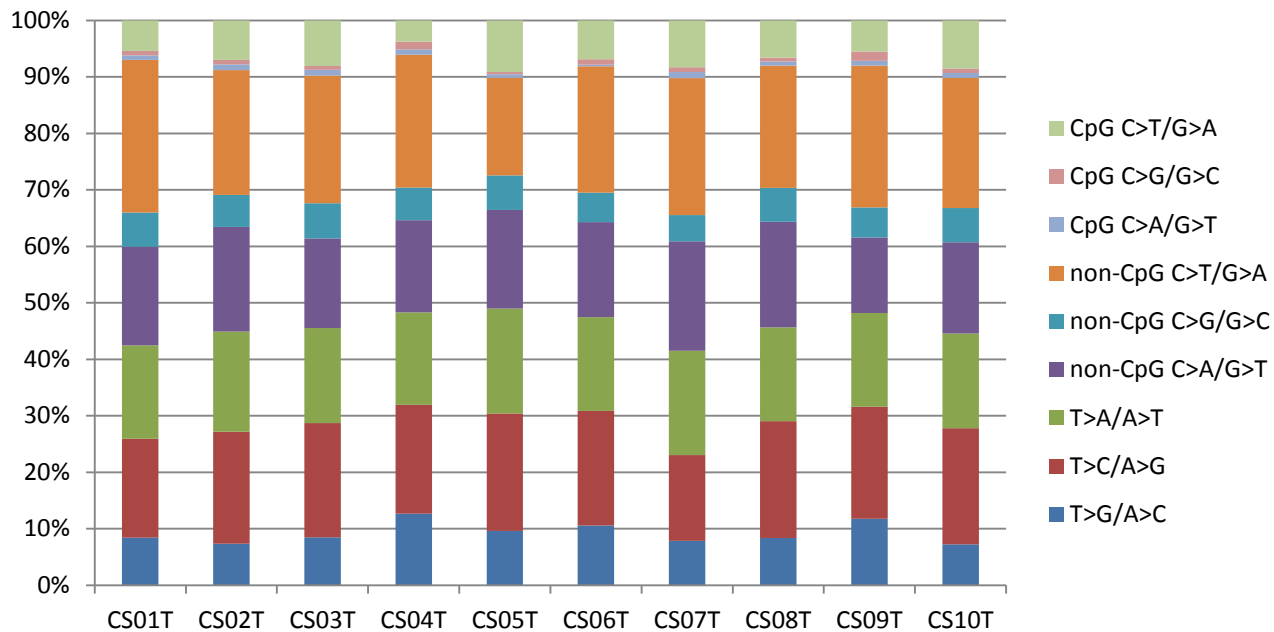

(B)

| Subset               | Case                 | P-value |
|----------------------|----------------------|---------|
| Central type         | CS2T, 5T, 7T, 8T, 9T | 0.90    |
| <i>IDH1</i> mutation | CS 2T, 8T            | 0.11    |

By permutation test

Supplement: Supp_Figure_S2.pdf [file Supp_Figure_S2.pdf]

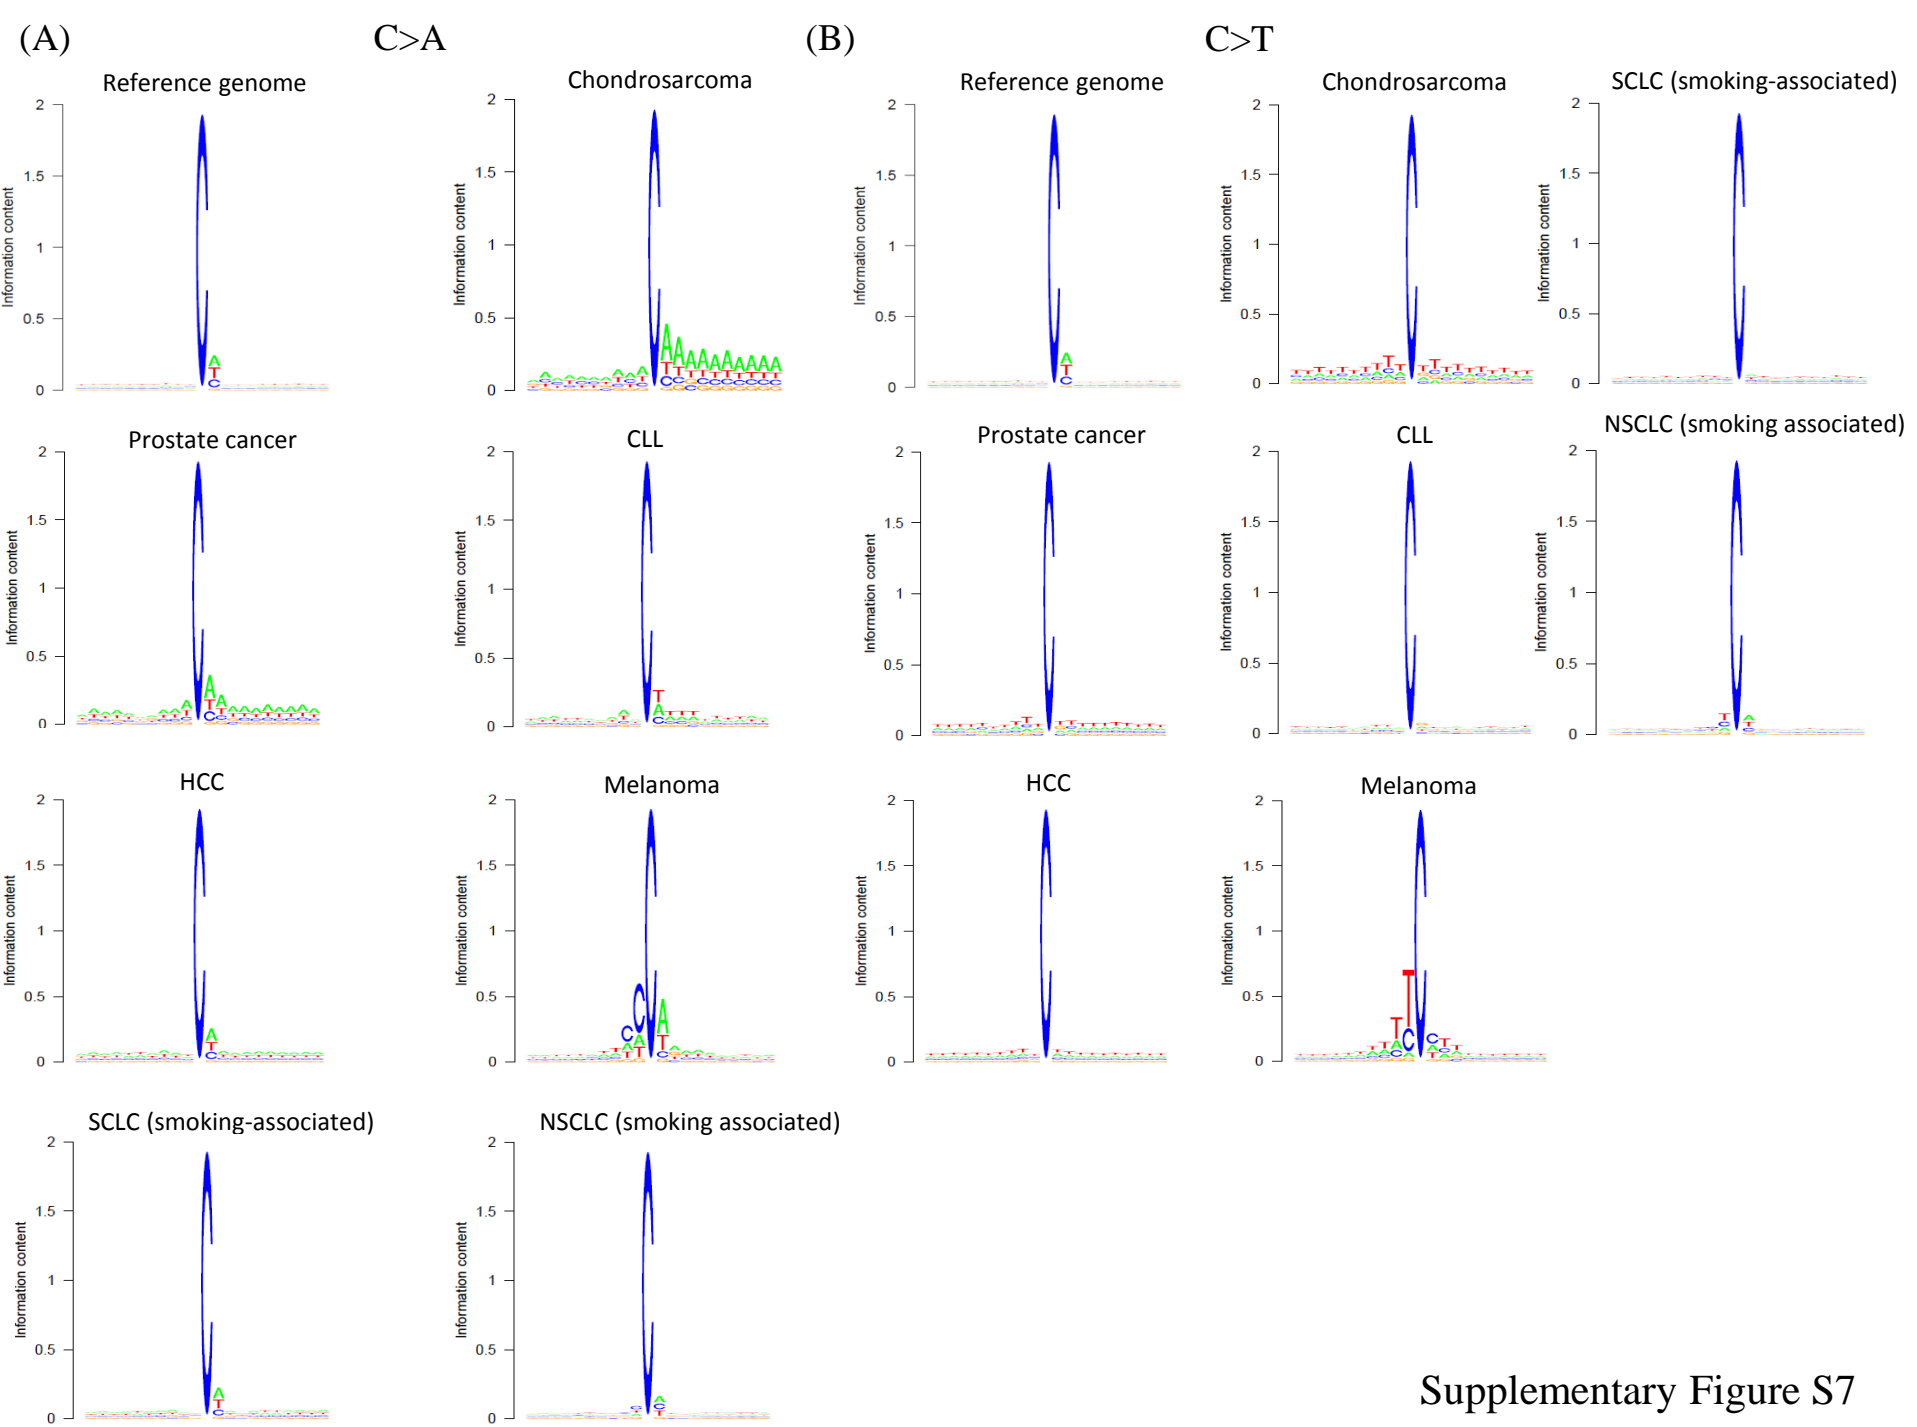

Supplement: Supp_Figure_S7.pdf [file Supp_Figure_S7.pdf]

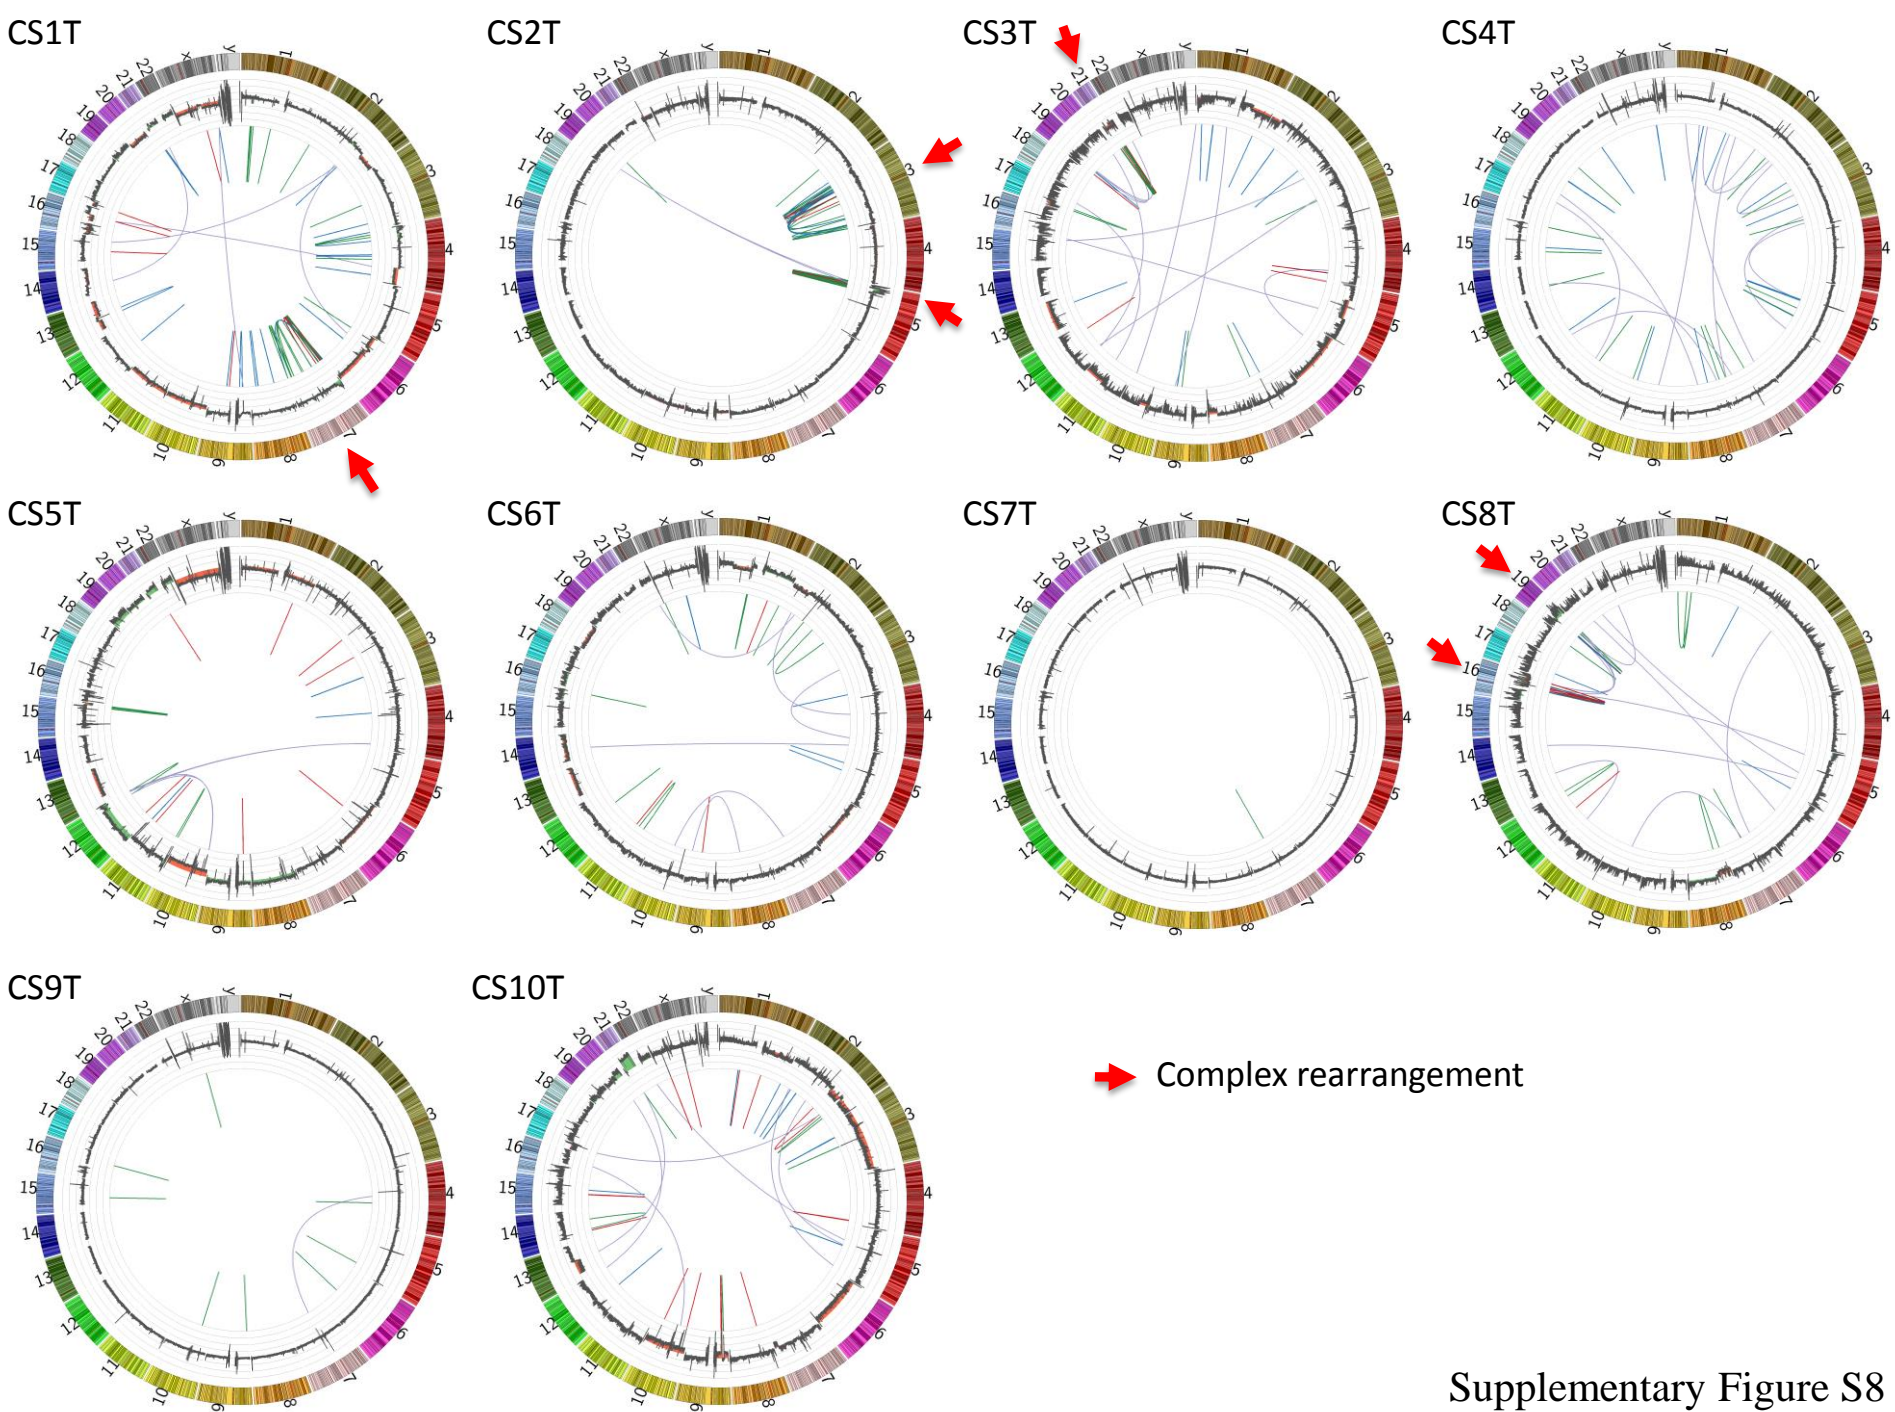

Supplement: Supp_Figure_S8.pdf [file Supp_Figure_S8.pdf]

## Chromosome 7 in CS1T

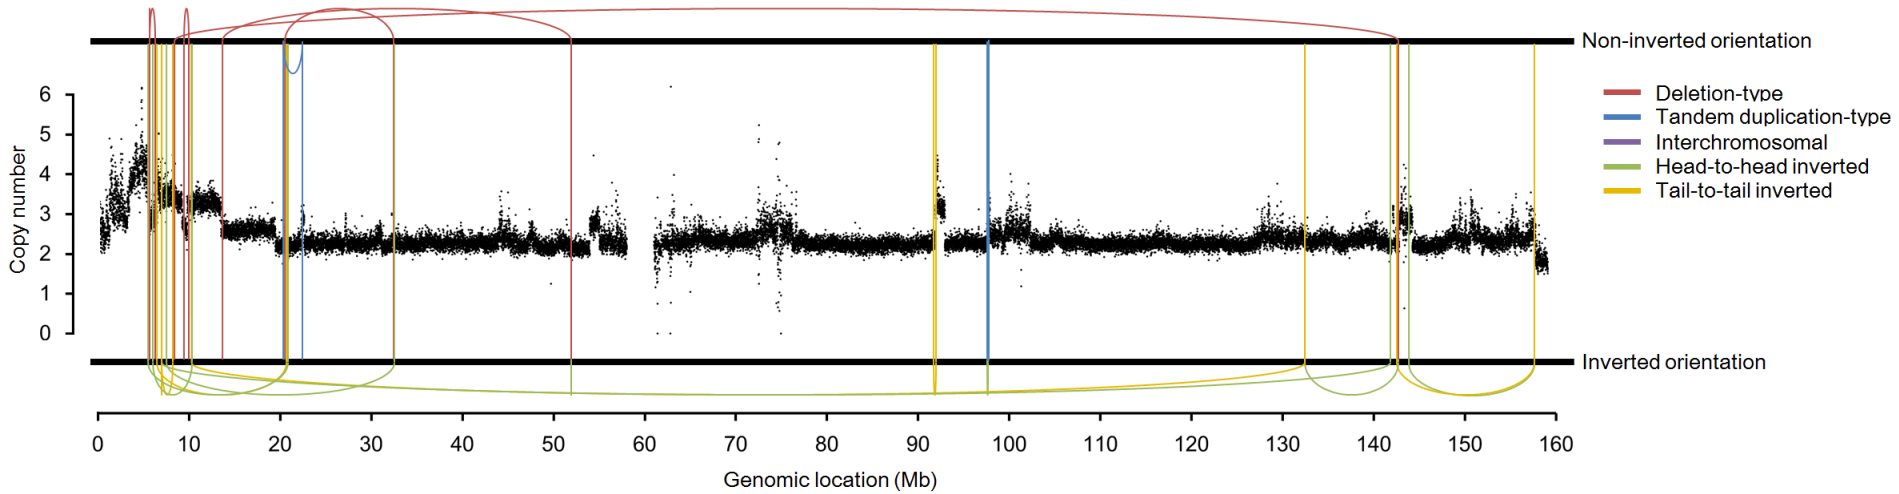

## Chromosome 3 in CS2T

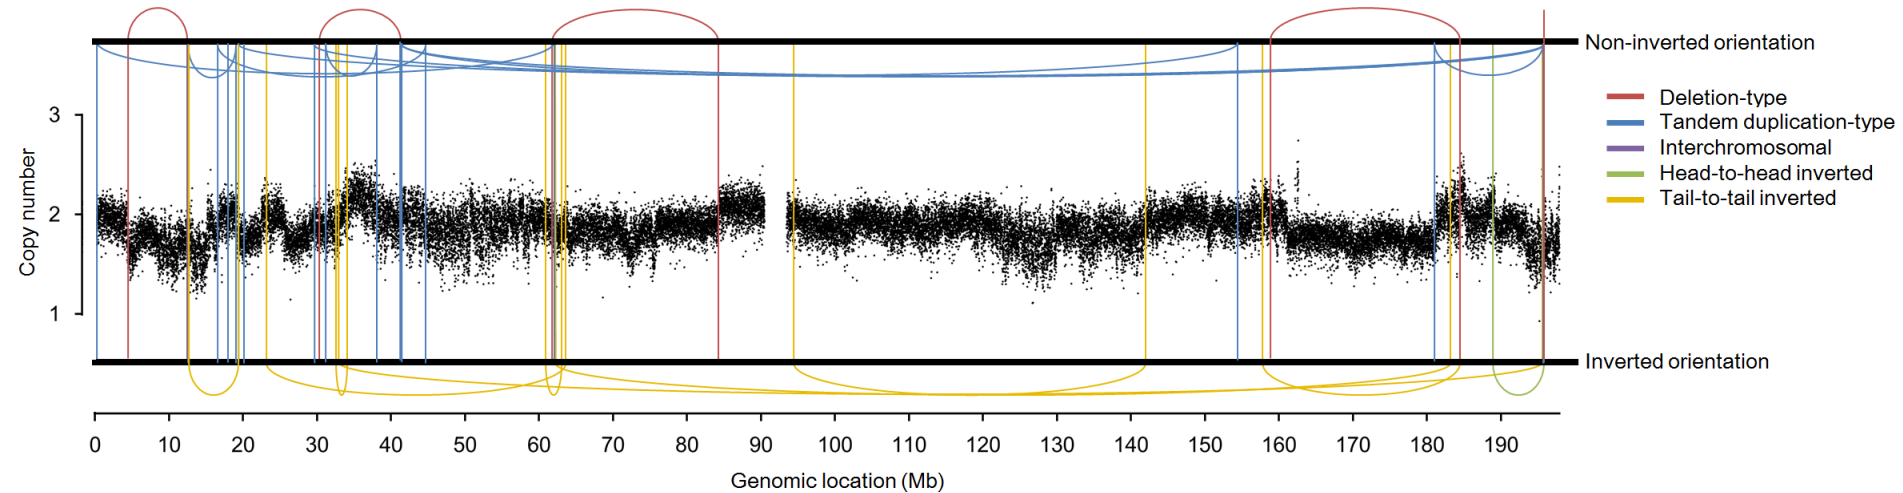

Supplement: Supp_Figure_S9A.pdf [file Supp_Figure_S9A.pdf]

## Short arm of chromosome 5 in CS2T

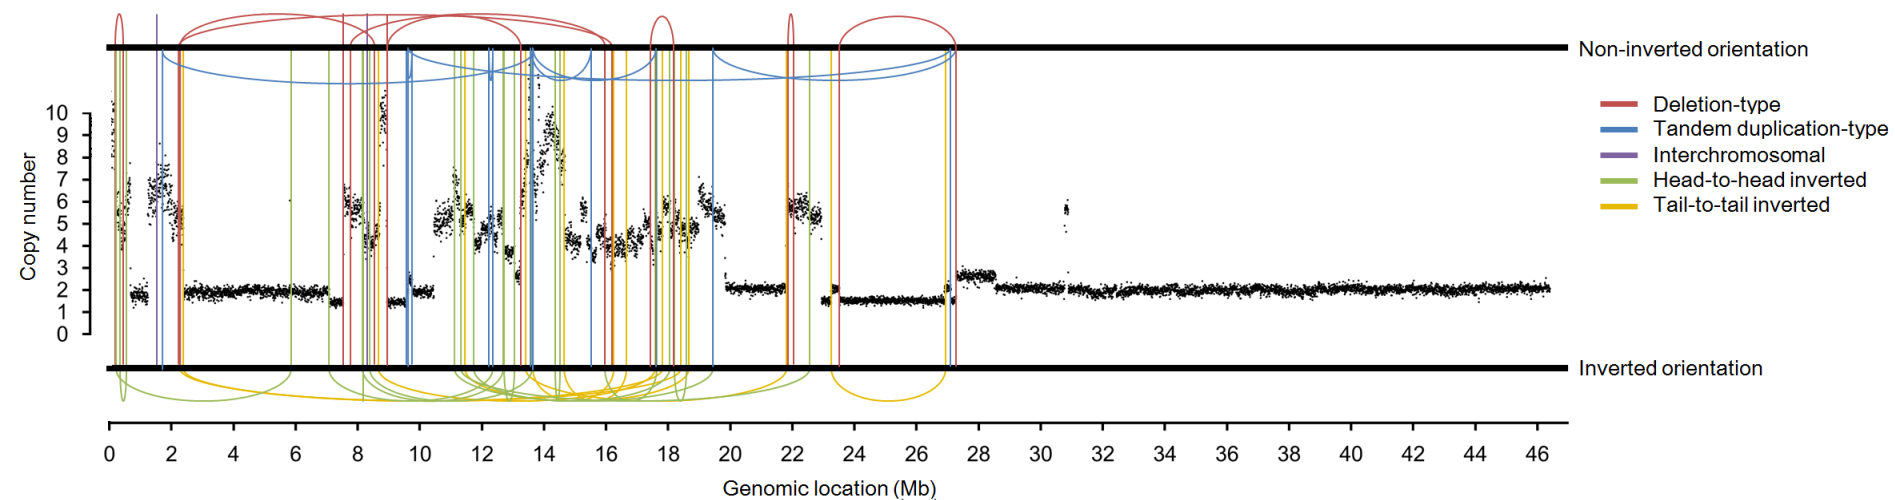

## Long arm of chromosome 21 in CS3T

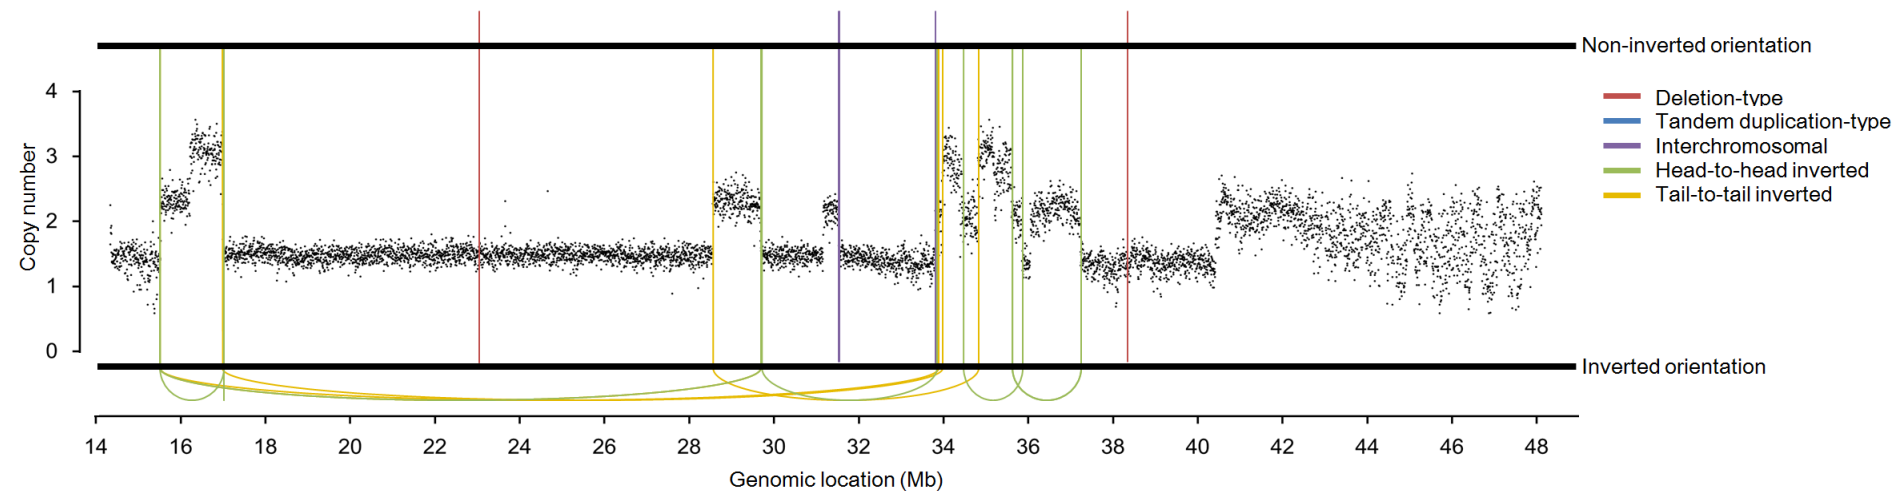

Supplement: Supp_Figure_S9B.pdf [file Supp_Figure_S9B.pdf]

Chromosome 16 in CS8T

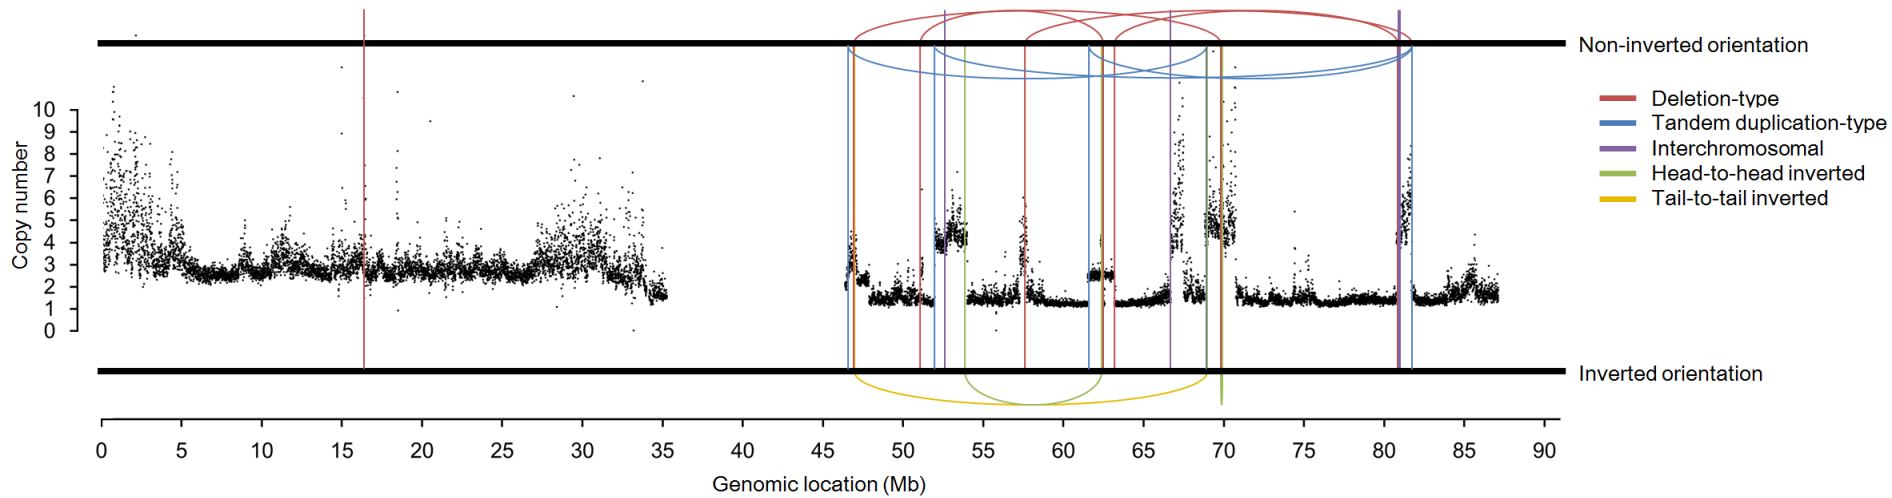

Chromosome 19 in CS8T

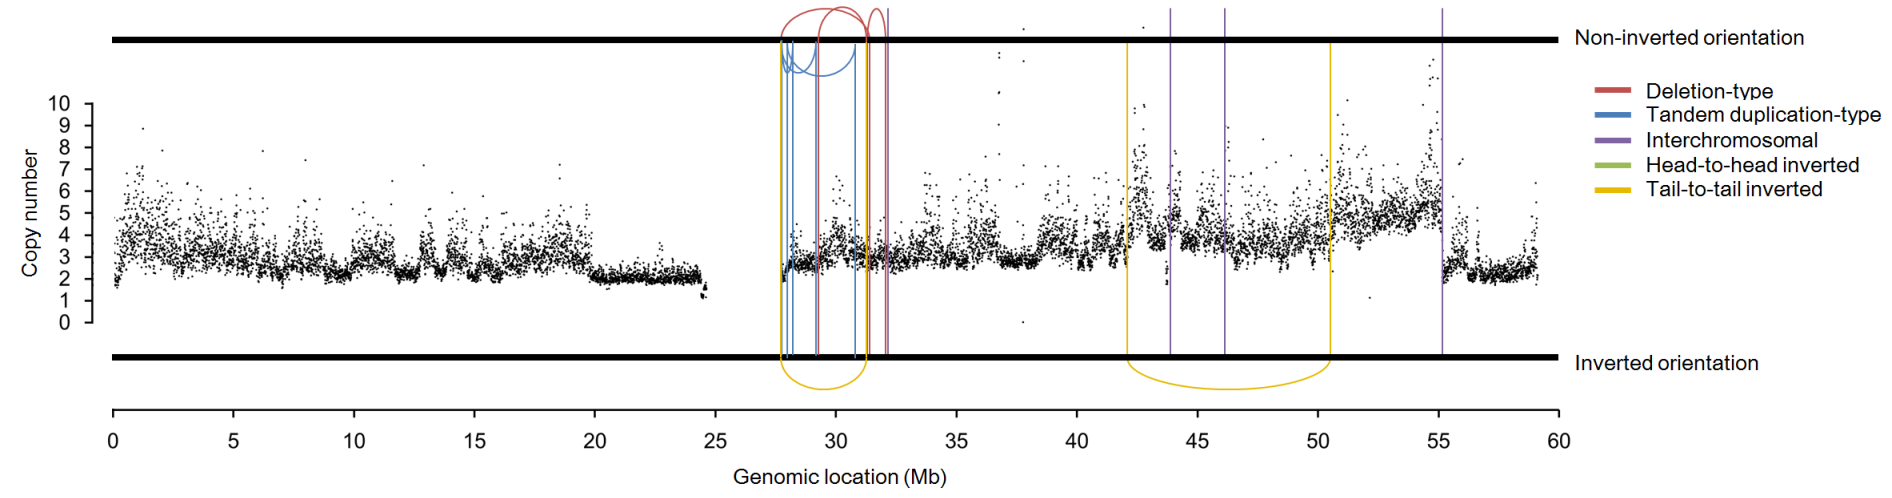

Supplement: Supp_Figure_S9C.pdf [file Supp_Figure_S9C.pdf]
